1 **Title:**

2 Stomatal anatomy, leaf structure and nutrients of tropical rainforest tree species respond to altitude  
3 in a coordinated manner in accordance with the leaf economics spectrum

4 **Running title:**

5 Response of stomatal traits to altitude

6

7 **Authors:**

8 Bhagya Weththasinghe<sup>1</sup>, Iroja Caldera<sup>1</sup>, Nimalka Sanjeevani<sup>2</sup>, Dilum Samarasinghe<sup>3</sup>, Himesh  
9 Jayasinghe<sup>4</sup>, Asanga Wijethunga<sup>5</sup>, Janendra De Costa<sup>6,7</sup>

10 <sup>1</sup>Department of Plant Sciences, Faculty of Science, University of Colombo, Sri Lanka

11 <sup>2</sup>Faculty of Applied Sciences, University of Jaffna, Sri Lanka

12 <sup>3</sup>Postgraduate Institute of Archaeology, University of Kelaniya, Sri Lanka

13 <sup>4</sup>National Institute of Fundamental Studies, Kandy, Sri Lanka

14 <sup>5</sup>Department of Biological Sciences, Faculty of Applied Sciences, Rajarata University of Sri  
15 Lanka

16 <sup>6</sup>Department of Crop Science, Faculty of Agriculture, University of Peradeniya, Sri Lanka

17 <sup>7</sup>Corresponding author (janendramg@agri.pdn.ac.lk) ORCID-ID 0000-0003-1923-0992

18

19 **Abstract**

20 Understanding taxon level responses of key plant traits to environmental variation across tropical  
21 rainforests (TRFs) is important to determine their response to climate change. We used an  
22 altitudinal gradient (from 150 to 2100 m above sea level, asl) across TRFs in Sri Lanka to answer  
23 the following questions: (a) Does the response to altitude by stomatal traits differ among plant taxa  
24 in TRFs?; (b) Are the altitudinal responses of key leaf structural traits (e.g. leaf mass per area,  
25 LMA) and major leaf nutrient (nitrogen, N, and phosphorus, P) concentrations linked to the  
26 corresponding variation in stomatal traits in a coordinated response across taxa?; (c) How strong  
27 is the influence of climatic variation on responses of leaf traits to altitude?. Leaf samples were  
28 collected in permanent sampling plots within rainforest reserves at Kanneliya (150 m asl),  
29 Sinharaja- Enasalwatta (1050 m), Hakgala (1800 m) and Pidurutalagala (2100 m) from 19 species  
30 in three plant genera (*Calophyllum*, *Semecarpus* and *Syzygium*). Stomatal density, guard cell  
31 length and epidermal density showed variation among taxa, but did not respond to altitude.  
32 Potential conductance index (PCI), a proxy for photosynthetic capacity, decreased with increasing  
33 altitude, in a common response across taxa. We found evidence that altitudinal responses of LMA,  
34 leaf N and P were linked to stomatal responses in a coordinated manner, where key features were  
35 the negative correlations between PCI and LMA and between proxy photosynthetic N- and P-use  
36 efficiencies ('PNUE' and 'PPUE') and LMA. We found strong responses to climatic variation  
37 across taxa and altitudes, where PCI, 'PNUE' and 'PPUE' increased and LMA decreased with  
38 increasing temperature, precipitation and solar irradiance. We conclude that stomatal traits of tree  
39 species in TRFs form part of a coordinated leaf trait response to environmental change which is in  
40 accordance with the leaf economics spectrum.

41 **Key words:** *leaf traits, tropical rainforests, Sri Lanka, climate variation, stomatal anatomy*

## 42 **Introduction**

43 Tropical rainforests (TRFs) are one of the most sensitive ecosystems to environmental change  
44 (Malhi et al. 2009, 2014, Zelazowski et al. 2011, Hubau et al. 2020). The high diversity of plant  
45 species in TRFs are likely to elicit different responses by different species to changes in climatic  
46 and soil variables (Hofhansl et al. 2020). Therefore, it is important to determine the species/genus  
47 level variation of responses to understand and predict ecosystem responses to environmental  
48 perturbations such as long-term climate change and climate extremes.

49 Altitudinal gradients are used as a means of detecting the influence of environmental change on  
50 tropical ecosystems, their processes and productivity (Malhi et al. 2010, 2017). Ecosystems such  
51 as TRFs which span a wide range of altitudes experience changes in several key environmental  
52 variables that vary with altitude. For example, air and soil temperatures, atmospheric pressure,  
53 vapour pressure deficit and partial pressure of CO<sub>2</sub> (pCO<sub>2</sub>) decrease with altitude whereas solar  
54 irradiance, wind speed and incident UV radiation could increase (Barry 1992, Körner 2007). Such  
55 changes in climatic variables along altitudinal gradients have induced altitude-linked variations in  
56 soil properties by influencing key soil processes such as mineralization and organic matter  
57 decomposition (Dieleman et al. 2013). Evolutionary and adaptive responses of plants to altitude-  
58 linked gradients in climate and soil variables have led to variations in species composition and  
59 diversity in TRFs along altitudinal gradients (Lieberman et al. 1996, Vazquez G and Givnish 1998,  
60 Aiba and Kitayama 1999, Givnish 1999). Furthermore, differences in key plant functional  
61 traits/leaf traits have been observed across plant species that inhabit altitudinal gradients (Oliveras  
62 et al. 2020).

63 Stomata occupy a strategic location in plants to regulate their carbon and water balances via leaf-  
64 air exchange of CO<sub>2</sub> and water vapour. Therefore, responses of stomatal density and size to

65 altitude represent a key pathway to optimize carbon and water balances in the face of  
66 environmental variation across an altitudinal gradient. Many early work reported increased  
67 stomatal density (SD) and stomatal index (SI) with increasing altitude (Korner and Cochrane 1985,  
68 Korner et al. 1986, McElwain 2004, Kouwenberg et al. 2007), which was interpreted as  
69 confirmation of the decrease of SD and SI with increasing pCO<sub>2</sub>, reported by (Woodward 1987,  
70 Woodward et al. 2002). However, a broader survey of literature shows a diverse range of stomatal  
71 responses to altitude. Accordingly, increased SD and SI with increasing pCO<sub>2</sub> along altitudinal  
72 gradients (Hu et al. 2015) and time (Bai et al. 2015) have been reported. Furthermore, increases  
73 in SD and SI up to 2800 - 3000 m above mean sea level (asl) have been observed to reverse in  
74 some plant species at higher altitudes (Qiang et al. 2003, Li et al. 2006, Luo et al. 2006). In  
75 comparison to SD and SI, response of stomatal size, measured as the product between guard cell  
76 length (GCL) and closed stomatal width, to environmental variation has been studied less  
77 frequently (Lomax et al. 2009). A highly-conserved inverse relationship has been shown between  
78 stomatal density and size across different taxonomic groups and environmental variables (Franks  
79 and Beerling 2009, Doheny-Adams et al. 2012). However, GCL of *Arabidopsis thaliana* ecotypes  
80 from a range of altitudes from 50 to 1260 m amsl showed all possible responses (i.e. increase,  
81 decrease and no change) to increased pCO<sub>2</sub> while not showing significant correlations with either  
82 SD or SI (Caldera et al. 2017). The above range of stomatal responses illustrates the inter- and  
83 intra-specific diversity in this response. Accordingly, in an ecosystem of high species diversity  
84 such as the TRFs, a diversity of stomatal responses to altitude could be expected. Long-term  
85 evolutionary responses and short-term acclimation to environmental variation across altitudes  
86 probably combine to bring about these diverse stomatal responses (Hultine and Marshall 2000,  
87 Qiang et al. 2003, Franks and Beerling 2009, Haworth et al. 2015).

88 As stomatal anatomy influences the assimilate supply for construction of leaves, altitudinal  
89 variation of leaf structural traits such as the leaf mass per area (LMA) could be linked to the  
90 corresponding variation of stomatal traits. Leaf mass per area is a measure of assimilate investment  
91 per unit area of photosynthetic surface and is regarded as a key trait of the leaf economic spectrum  
92 (Wright et al. 2004). Shi et al. (2015) showed that diverse responses of stomatal traits to altitude  
93 were linked to leaf economic strategy and plant growth habit. Nitrogen (N) and phosphorus (P) are  
94 the two foremost plant nutrients and are considered most limiting for plant growth (Reich and  
95 Oleksyn 2004). Nitrogen is an essential component of enzymes, especially the key photosynthetic  
96 enzyme Rubisco, while P is a key part of nucleic acids, cell membranes and energy-carriers such  
97 as ATP and NADPH. Leaf N and P concentrations are indicative of their availability in the soil as  
98 well as their proportional allocation to leaves to meet the physiological demands of processes that  
99 require N (e.g. enzymes) and P (e.g. ATP and nucleic acids). Accordingly, variation in leaf N and  
100 P concentrations across an altitudinal gradient, when considered along with corresponding  
101 variations in stomatal and leaf structural traits could be part of an integrated ecosystem level  
102 response to environmental variation as represented by altitude (Oliveras et al. 2020). The role of  
103 genetic variation, based on taxonomic grouping, as opposed to variation caused by local  
104 environmental factors is poorly understood for leaf traits in different plant species in complex  
105 ecosystems such TRFs.

106 Tropical rainforests of Sri Lanka (TRFSL) are located in the humid tropical climatic zone of Sri  
107 Lanka in its south-western plains and the western slope of its central highlands. Lowland  
108 rainforests are found in the lower altitudes up to ca. 1000 m amsl while montane forests are found  
109 in the higher altitudes up to 2200 m. Species richness and diversity of TRFSL have been shown  
110 to decrease with increasing altitude (Sanjeevani et al. 2020) and there are no plant species

111 inhabiting the whole altitudinal range of the TRFSL (Sanjeevani et al. Unpublished). Therefore,  
112 genetically-determined variations in stomatal and leaf traits among different species inhabiting  
113 different altitudes would confound responses of these traits to environmental gradients across  
114 altitudes. Furthermore, proportional contributions from genetic and environmental components to  
115 the observed variation of these traits could be different for different species (Zhang et al. 2012).  
116 In this study, we examine altitudinal variation of stomatal traits in three plant genera that have  
117 different species inhabiting a sufficiently wide altitudinal gradient with the objective of identifying  
118 variation patterns of their stomatal traits with altitude and then elucidating their possible  
119 environmental and genus-level genetic controls. As a second objective, we examine possible inter-  
120 relationships between stomatal and leaf traits with a view to determine possible trait assemblies  
121 that underpin the response of these traits to specific climatic variation across altitudes. We asked  
122 the following questions: (a) Does the response to altitude by stomatal anatomical traits differ  
123 among plant taxa (e.g. genera) in TRFs?; (b) Are the altitudinal responses of key leaf structural  
124 traits (LMA) and major leaf nutrient (N and P) concentrations linked to the corresponding variation  
125 in stomatal traits in a coordinated response across different taxa (e.g. genera, species)?; (c) How  
126 strong is the influence of climate variation across altitudinal gradients on responses of leaf traits  
127 to altitude?. Specifically, we tested the following hypotheses: Hypothesis 1: There is significant  
128 variation among taxa in the response of their stomatal traits to variation in altitude; Hypothesis 2:  
129 Altitudinal responses of key leaf structural traits, major leaf nutrient concentrations and stomatal  
130 traits form a coordinated response across different taxa in tropical rainforests; Hypothesis 3:  
131 Responses of leaf traits to altitude are strongly influenced by climatic variables that vary across  
132 altitudinal gradients.

133

## 134 **Materials and methods**

### 135 *Study sites and climate*

136 Collection of leaf samples for the study was carried out in six permanent sampling plots (PSPs) of  
137 1 ha (100 m x 100 m) each established along an altitudinal gradient from 117 m to 2080 m asl (Fig.  
138 1). All plots were located in the undisturbed areas inside selected TRFSL. Two plots were located  
139 in the Kanneliya Forest Reserve. Another two plots were located in the Sinharaja Forest Reserve  
140 (Enasalwatte) which is a World Heritage site. The other two plots were located in the Hakgala  
141 Strict Nature Reserve and Pidurutalagala Forest Reserve. Long-term (1970-2000) averages of the  
142 climate variables of study sites were obtained from the high-resolution (1 km<sup>2</sup>) global climatic  
143 database WorldClim 2 (Fick and Hijmans 2017) (Table 1). Long-term annual averages of the  
144 mean, maximum and minimum air temperatures, vapour pressure, wind speed and daily solar  
145 irradiance were computed from their monthly means. Long-term average annual precipitation was  
146 computed from the respective annual totals.

147 **Table 1.** Study sites and their long-term (1970-2000) climatic variables

148

| Location | Latitude<br>(N) | Longitude<br>(E) | Altitude<br>(m) | T <sub>AV</sub><br>(°C) | T <sub>max</sub><br>(°C) | T <sub>min</sub><br>(°C) | R <sub>F</sub><br>(mm y <sup>-1</sup> ) | Radiation<br>(kJ m <sup>-2</sup> d <sup>-1</sup> ) | WVP<br>(kPa) | WS<br>(ms <sup>-1</sup> ) |
|----------|-----------------|------------------|-----------------|-------------------------|--------------------------|--------------------------|-----------------------------------------|----------------------------------------------------|--------------|---------------------------|
| KDN 1    | 6.24749 N       | 80.34071 E       | 117             | 26.3                    | 29.8                     | 23.5                     | 3656.0                                  | 18945.3                                            | 2.8          | 2.3                       |
| KDN 2    | 6.26045 N       | 80.35112 E       | 174             | 26.3                    | 29.3                     | 22.8                     | 3788.0                                  | 18832.8                                            | 2.8          | 2.3                       |
| ENS 2    | 6.39433 N       | 80.59709 E       | 1042            | 21.3                    | 24.5                     | 18.1                     | 3103.0                                  | 17910.3                                            | 2.0          | 2.2                       |
| ENS 2    | 6.39441 N       | 80.59652 E       | 1065            | 21.3                    | 24.5                     | 18.1                     | 3103.0                                  | 17910.3                                            | 2.0          | 2.2                       |
| HKG      | 6.92725 N       | 80.81839 E       | 1804            | 17.2                    | 20.3                     | 13.8                     | 2017.0                                  | 17688.3                                            | 1.8          | 2.0                       |
| PTG      | 6.98197 N       | 80.77276 E       | 2080            | 15.3                    | 18.4                     | 12.3                     | 1903.0                                  | 17460.0                                            | 1.2          | 1.9                       |

149

150 KDN 1 & 2 – Kanneliya Forest Reserve Plots 1 & 2; ENS 1 & 2 – Sinharaja-Enasalwatte Plots 1 & 2; HKG  
151 – Hakgala Strict Nature Reserve; PTG – Pidurutalagala Forest Reserve. T<sub>AV</sub> – Mean annual average  
152 temperature; T<sub>max</sub> - Mean annual maximum temperature; T<sub>min</sub> - Mean annual minimum temperature; R<sub>F</sub> -  
153 Mean annual total precipitation; Radiation – Mean daily incident solar radiation; WVP - Mean atmospheric  
154 vapour pressure; WS – Mean wind speed (Source: Fick and Hijmans, 2017).

155

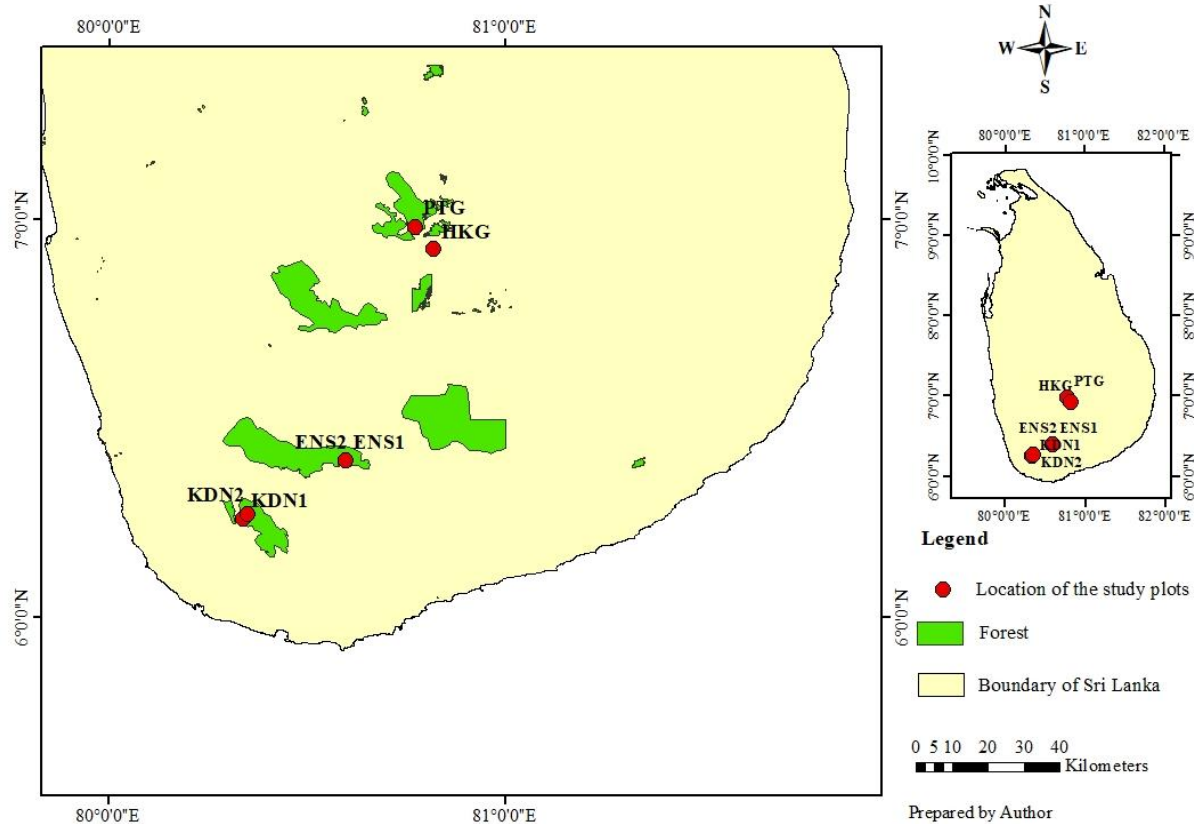

156

157 **Figure 1.** Permanent sampling plots of the present study located at different altitudes in tropical rainforests  
158 of Sri Lanka. Kanneliya Plot 1 (KDN1-117 m asl), Kanneliya Plot 2 (KDN2-174 m asl), Sinharaja-  
159 Enasalwatta Plot 1 (1042 m asl), Sinharaja-Enasalwatta Plot 2 (1065 m asl), Hakgala Plot (1804 m asl) and  
160 Piduruthalagala Plot (2080 m asl).

### 161 *Plant species*

162 A complete census of all plants having a diameter at breast height (1.3 m above ground level or  
163 buttress) of 10 cm or greater had been carried out in the PSPs in 2019 (Sanjeevani et al. 2020).

164 Plant species for the study were selected based on the availability of a species across a sufficiently  
165 wide altitudinal range. However, except *Semecarpus gardneri*, which was present in plots at 150  
166 m and 1050 m, there was no other species inhabiting more than one altitude. At the genus level,  
167 there were three genera, viz. *Syzygium*, *Semecarpus* and *Calophyllum* which had different species  
168 occupying a wide altitudinal range. Accordingly, 19 species from these genera were selected for  
169 the study (Table 2).



170 **Table 2.** Species from selected genera for the study and their locations

171

| Location                  | Altitude (m)      | <i>Syzygium</i>         | <i>Semecarpus</i>    | <i>Calophyllum</i>         |
|---------------------------|-------------------|-------------------------|----------------------|----------------------------|
| Kanneliya                 | 150 <sup>†</sup>  | <i>S. alubo</i>         | <i>S. walkeri</i>    | <i>C. bracteatum</i>       |
|                           |                   | <i>S. neesianum</i>     | <i>S. gardneri</i>   | <i>C. cordato-oblongum</i> |
|                           |                   | <i>S. firmum</i>        | <i>S. subpeltata</i> |                            |
| Sinharaja-<br>Enasalwatte | 1050 <sup>†</sup> | <i>S. cylindricum</i>   | <i>S. gardneri</i>   | <i>C. acidus</i>           |
|                           |                   | <i>S. micranthum</i>    | <i>S. parvifolia</i> |                            |
|                           |                   | <i>Syzygium</i> new sp. |                      |                            |
| Hakgala                   | 1800              | <i>S. paniculatum</i>   | <i>S. obovata</i>    |                            |
|                           |                   | <i>S. zeylanicum</i>    |                      |                            |
| Pidurutalagala            | 2100              | <i>S. revolutum</i>     |                      | <i>C. walkeri</i>          |
|                           |                   | <i>S. rotundifolium</i> |                      |                            |

172 <sup>†</sup>Altitude at mid-point between the two plots at Kanneliya and Sinharaja-Enasalwatte was selected.

173

174 The three core-eudicot genera belong to the clade Rosids and are classified under three different  
175 orders, viz., *Calophyllum* (Calophyllaceae) in Malpighiales, *Semecarpus* (Anacardiaceae) in  
176 Sapindales and *Syzygium* (Myrtaceae) in Myrtales (Angiosperm Phylogeny Group 2009).  
177 *Calophyllum* is a pantropical genus consisting of approximately 187 species. In Sri Lanka, 11 out  
178 of 13 *Calophyllum* species are endemic and are restricted to rainforests (Kostermans 1980). About  
179 50 species of *Semecarpus* species are distributed from tropical Asia (Indo-Malaysian region) to  
180 Oceania. All 12 species of *Semecarpus* in Sri Lanka are endemic and mainly distributed in low- to  
181 mid-altitude rainforests (Meijer 1983). Approximately 1200 species of *Syzygium* are found in  
182 tropical Africa, subtropical to tropical Asia, Australia, New Caledonia, New Zealand and Pacific  
183 islands. There are 32 *Syzygium* species among Sri Lankan flora and 25 of them are endemic. The  
184 genus has a wide altitudinal range in Sri Lanka with a majority of species in higher-altitude  
185 rainforests. There are some introduced species, usually under cultivation while some are  
186 naturalized (Ashton 1981).

187 *Sample collection*

188 Samples of mature, healthy leaves were taken from harvested branches of trees of the above 19  
189 species. Three leaves per plant from five plants per species were used for stomatal measurements.  
190 Species from two PSPs at near equal altitudes (Kanneliya and Enasalwatta) were pooled for  
191 measurements and data analysis. All measurements were done on fully-expanded mature leaves  
192 of each branch.

193 *Measurement of stomatal traits*

194 Using high precision Polyvinylsiloxane (Muller-Omicron GmbH & Co. KG, Germany) negative  
195 impressions were acquired from leaves within 24 hours following harvesting of branches, before  
196 leaf wilting occurred. Impressions were taken from a leaf position in the middle between mid-rib  
197 and leaf margin and in the middle between the apex and the base of the leaf. A preliminary study  
198 on each sampled species revealed that stomata are present only on the abaxial leaf surface.  
199 Therefore, the negative impressions were taken only from the abaxial leaf surface.

200 Afterwards transparent cellulose varnish was applied on the negative silicone rubber impressions.  
201 The varnish was allowed to dry off and then the positive impressions of the leaf abaxial surfaces  
202 were peeled off. Thereafter, they were mounted onto microscopic slides and covered with  
203 coverslips which were secured with adhesive tape. Five random fields per leaf sample were  
204 selected and the images of these fields were taken under light microscopy (Primo Star, Zeiss,  
205 Germany). This was done by a camera coupled with the microscope and Zeiss Zen microscope  
206 software. Using these microscopic images (Plates S1-S5), number of stomata and epidermal cells  
207 per microscopic field were counted.

208 All sampled species are rainforest tree species. Therefore, the borders of epidermal cells were  
209 difficult to differentiate in the leaf imprints. To overcome this difficulty all images were sharpened  
210 and the black and white contrast was adjusted using Adobe Photoshop 7.0.1. The multi-point tool  
211 of the ImageJ software was used when counting stomata and epidermal cells. Editing of images  
212 and use of the multi-point tool enabled precise counts of stomata and epidermal cells.

213 Stomatal density (SD) and epidermal density (ED) were calculated as the number of stomata and  
214 epidermal cells per unit leaf area ( $\text{mm}^{-2}$ ). Stomatal index (SI) was computed as the ratio between  
215 stomatal number and the number of total epidermal cells, including stomatal guard cells, using the  
216 formula,  $SI = (SD/[SD + ED] \times 100)$ .

217 Guard cell length (GCL) was measured using the slides prepared for determination of stomatal  
218 traits. Measurements were taken by the Line tool of the Graphics in UI Automation mode of the  
219 Zeiss Zen Microscope Software. This was done for one stomate each from randomly selected five  
220 fields of view per leaf sample.

221 Potential conductance index (PCI) was computed as  $PCI = [GCL]^2 \times SD \times 10^{-4}$  (Holland and  
222 Richardson 2009), where GCL is given in  $\mu\text{m}$  and SD in stomata per  $\text{mm}^2$ , assuming that the  
223 stomatal aperture area is proportional to the  $GCL^2$ . As PCI combines measures of maximum  
224 stomatal size (GCL) with stomatal density (SD), it can be considered a measure of maximum  
225 stomatal conductance ( $g_{\text{max}}$ ) (Franks and Beerling 2009).

#### 226 *Measurement of leaf structural traits and nutrients*

227 Leaf blade area (LBA) was measured on fully-expanded leaves by tracing the outline of the leaves  
228 on a white paper. A printed scale was kept on the white paper and images were taken by a camera.  
229 Leaf blade area was measured using these images using ImageJ software. The leaf samples were

230 dried to constant weight at 105°C in an oven (MOU-1125, SANYO, Japan). Each leaf was weighed  
231 separately using an electronic balance (AR2130, Ohaus Co., USA). Leaf mass per area was  
232 computed as the ratio between leaf dry mass and LBA. Taking PCI as a proxy for photosynthetic  
233 capacity (Wong et al. 1979, Farquhar and Sharkey 1982), proxy indices of photosynthetic nitrogen  
234 and phosphorus use efficiencies ('PNUE' and 'PPUE' respectively) were computed as the  
235 respective ratios of PCI with leaf N and P.

#### 236 *Determination of N and P concentrations of leaf tissues*

237 Leaf N concentration was measured using the modified Kjeldahl method (Motsara and Roy 2008).  
238 Leaf P concentration was measured by dry ashing at 450°C followed by digestion in HNO<sub>3</sub>.  
239 Phosphorus concentration of the ash extract was determined by the spectrophotometric vanadium  
240 phosphomolybdate method (Motsara and Roy 2008).

#### 241 *Statistical analysis*

242 An initial exploration of the distributions of measured variables within each species at each altitude  
243 was done with box plots. Normality of distributions was tested by the Shapiro-Wilk statistic  
244 computed with Proc Univariate in SAS<sup>®</sup> Studio (Version 9.4). The influence of genus and altitude  
245 on the measured traits was examined by a linear mixed model (LMM). As the three genera have  
246 been selected from among a large number of genera in the PSPs, the genus effect was considered  
247 as random. The altitude effect was considered as fixed because the selection of altitudes for leaf  
248 sampling was constrained to those where PSPs have been established. This LMM analysis was  
249 done for each trait using Proc Mixed in SAS with the residual (restricted) maximum likelihood  
250 method. The genus x altitude interaction was considered a random effect.

251 Inter-relationships among stomatal anatomical traits were determined by linear correlation analysis  
252 using all replicate measurements (i.e. n=1425). In order to examine inter-relationships among the  
253 leaf anatomical and structural traits and leaf nutrients, linear correlation analysis was done on the  
254 means of all leaf traits of the 19 plant species at different altitudes. The respective variables were  
255 averaged across altitudes, replicate trees, leaves and microscope fields when calculating species  
256 means. Influence of individual climatic variables on measured leaf traits were determined by  
257 simple linear regression. Data from all species and altitudes were pooled in the regressions  
258 between leaf traits and climatic variables. *Semecarpus gardneri* was the only species which was  
259 present at more than one altitude (i.e. at 150 and 1050 m). Mean values from *S. gardneri* at the  
260 two altitudes were considered as two separate data points in the correlation and regression  
261 analyses.

262 A factor analysis (Child 1990) was done to identify underlying factors that cause variation in leaf  
263 traits in the 19 plant species belonging to the three genera that are distributed across the altitudinal  
264 gradient. In this analysis also, *S. gardneri* at 150 and 1050 m were considered as two observations.  
265 The factor analysis was done using the principal axis method with prior communality estimates as  
266 one. All factors that showed Eigen values greater than one were extracted and varimax rotation  
267 was performed to identify variables that loaded on to extracted factors. Factor scores of the 20  
268 observations were plotted in the factor space of the two principal factors (i.e. the two factors having  
269 the highest Eigen values) to determine aggregation/separation of the 19 species based on their leaf  
270 traits. A cluster analysis using the complete linkage method was performed to determine species  
271 clusters among the 19 species, based on their leaf traits. Multivariate analysis of variance  
272 (MANOVA) and the Wilks' Lambda Statistic was used to determine the significance of differences  
273 between clusters. All statistical analyses were performed using SAS<sup>®</sup> Studio (Version 9.4).

## 274 Results

### 275 *Distributions of measured stomatal traits at different altitudes*

276 All stomatal traits showed substantial variation among species at a given altitude (Fig. S1).  
277 Species-wise distributions of most stomatal traits showed normality in a majority of species  
278 whereas most distributions of stomatal index deviated from normality (Table S1). The few outliers  
279 were located on both ends of the distributions.

### 280 *Influence of genus and altitude on stomatal traits*

281 Analysis of stomatal traits in a linear mixed model showed that the fixed effect of altitude was  
282 significant ( $p=0.06$ ) on potential conductance index (PCI), but was non-significant ( $p>0.07$ ) on all  
283 other stomatal traits (Table 3). The random effect of the genus contributed a higher percentage  
284 (56-64%) of the total variance of guard cell length (GCL), stomatal density (SD) and epidermal  
285 density (ED) in comparison to the genus x altitude interaction (10-26%) (Table 4). The genus  
286 effect contributed very little to the total variance of stomatal index (SI) and PCI (0-4%).

287 **Table 3.** Results of Type III tests for fixed altitude effect on leaf traits of plant species in tropical  
288 rainforests of Sri Lanka along an altitudinal gradient

289

|           | GCL   | SD    | ED    | SI    | PCI   | LMA    | LBA    | N      | P      | N:P    |
|-----------|-------|-------|-------|-------|-------|--------|--------|--------|--------|--------|
| $F_{3,4}$ | 1.21  | 0.50  | 1.47  | 1.65  | 5.84  | 26.30  | 17.87  | 13.72  | 2.33   | 0.73   |
| $p>F$     | 0.414 | 0.702 | 0.350 | 0.313 | 0.061 | 0.0043 | 0.0088 | 0.0143 | 0.2161 | 0.5840 |

290 GCL – Guard cell length; SD – Stomatal density; ED – Epidermal density; SI – Stomatal index; PCI –  
291 Potential conductance index; LMA – Leaf mass per unit area; LBA – Leaf blade area; N – Leaf nitrogen  
292 concentration; P – Leaf phosphorus concentration; N:P – Leaf nitrogen: phosphorus ratio.

293

### 294 *Variation of stomatal traits of different genera with altitude*

295 Guard cell length of *Calophyllum* was greater than that of *Semecarpus* and *Syzygium* at all  
296 altitudes (Fig. 2.a). There was no consistent trend with altitude for GCL of any genus, thus

297 confirming the absence of an altitude effect (Table 3). The two notable increases in GCL with  
 298 increasing altitude in *Calophyllum* at 1050 m and *Semecarpus* at 1800 m occurred because of a  
 299 single species (*Calophyllum acidus* and *Semecarpus obovata*, Fig. S1.a) having a substantially  
 300 higher GCL than others within the respective genera.

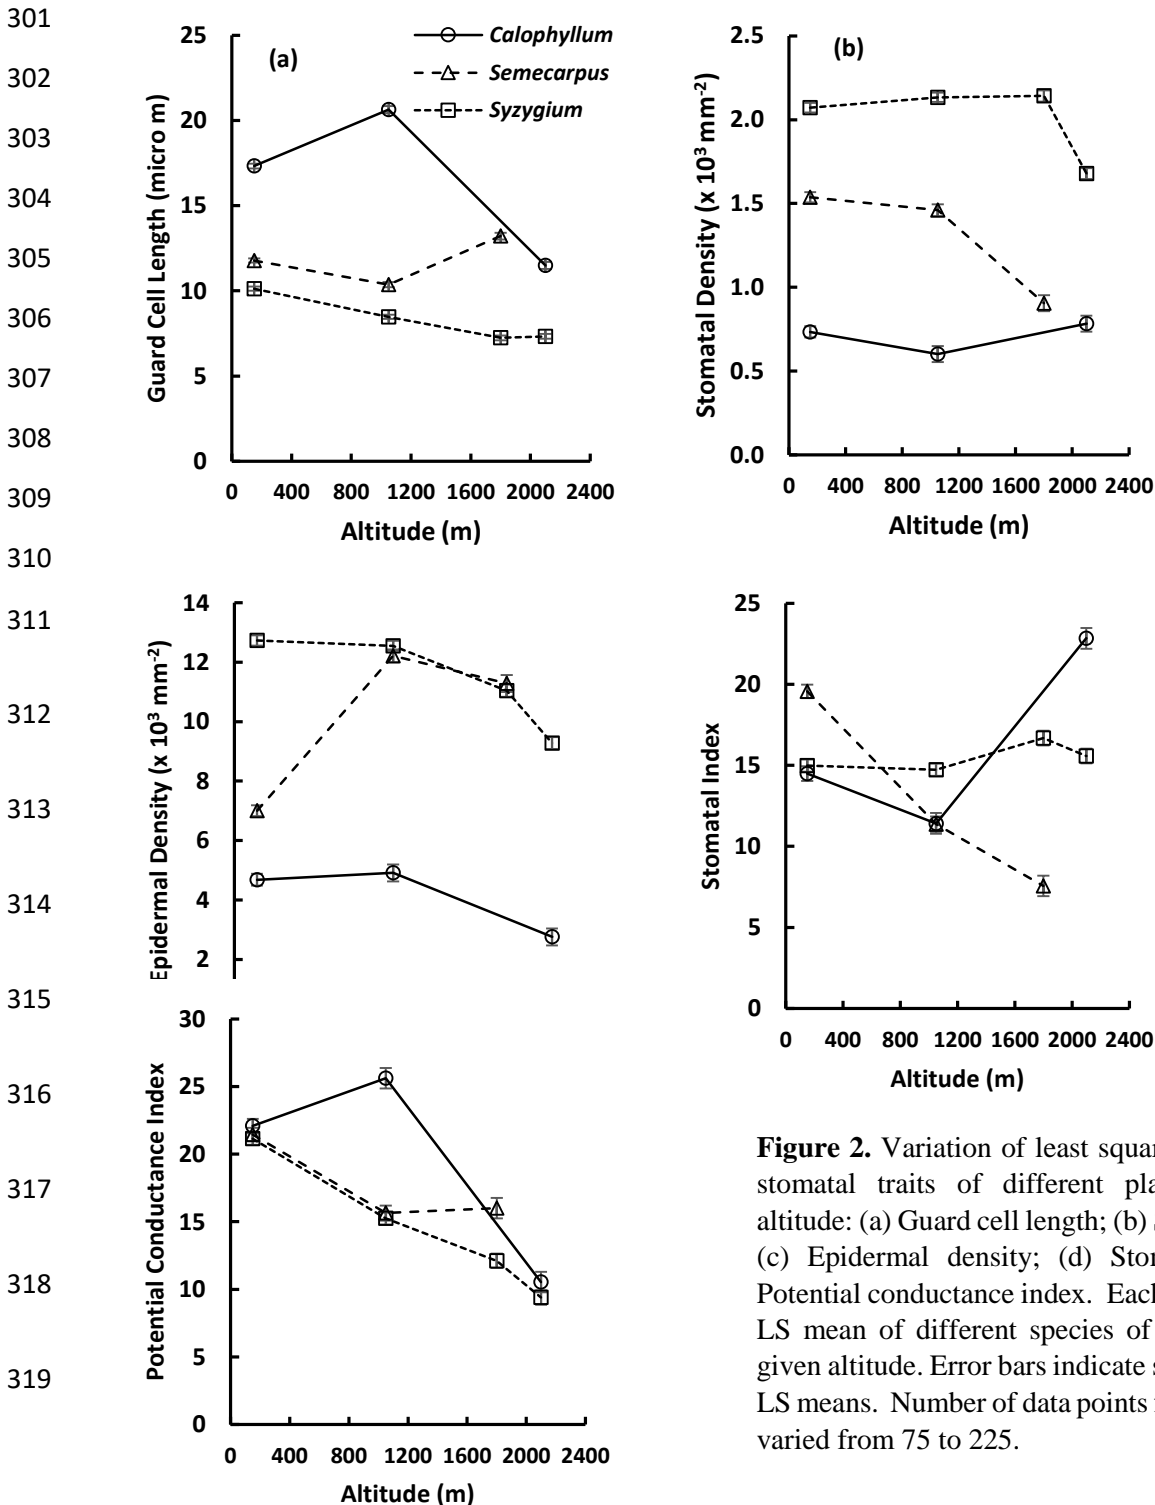

**Figure 2.** Variation of least square (LS) means of stomatal traits of different plant genera with altitude: (a) Guard cell length; (b) Stomatal density; (c) Epidermal density; (d) Stomatal index; (e) Potential conductance index. Each data point is the LS mean of different species of each genus at a given altitude. Error bars indicate standard errors of LS means. Number of data points for each LS mean varied from 75 to 225.

320 Stomatal density (SD) showed clear separation between the three genera with *Syzygium* having the  
321 highest and *Calophyllum* the lowest with *Semecarpus* intermediate (Fig. 2.b). In all genera,  
322 variations of SD with altitude were smaller than the variation among genera, thus confirming the  
323 higher variance component attributed to genus (Table 4). The two notable reductions of SD at  
324 higher altitudes in *Syzygium* and *Semecarpus* had occurred because of species level variation  
325 (*Syzygium rotundifolium*, *Syzygium revolutum* and *Semecarpus obovata*) (Fig. S1.b). These  
326 reductions contributed to the genus x altitude variance component. There is a highly-significant  
327 ( $p < 0.0001$ ) negative correlation between GCL and SD ( $r = -0.67$ ;  $n = 1425$ ) (Table S2). Similar  
328 correlations were evident at the genus level as well (*Syzygium*:  $r = -0.160$ ,  $p < 0.0001$ ,  $n = 735$ ;  
329 *Calophyllum*:  $r = -0.312$ ,  $p < 0.0001$ ,  $n = 300$ ; *Semecarpus*:  $r = -0.335$ ,  $p < 0.0001$ ;  $n = 390$ ).

330 Epidermal density (ED) of *Calophyllum* was substantially lower than those of *Semecarpus* and  
331 *Syzygium* (Fig. 2.c). Even though ED of all genera showed a decreasing trend from 1050 m  
332 onwards, the observed reductions were smaller than differences among genera, which confirmed  
333 the greater variance component due to the genus effect (Table 3). The lower ED of *Semecarpus*  
334 at 150 m, which occurred because of lower ED of all three *Semecarpus* species (i.e. *S. subpeltata*,  
335 *S. walkeri* and *S. gardneri*) at this altitude (Table 2), contributed to genus x altitude variance (Table  
336 4). Epidermal density showed a positive correlation with SD and a negative correlation with GCL  
337 (Table S2).

338 Stomatal index (SI) did not show a consistent variation with altitude or genus (Fig. 2.d).  
339 Accordingly, the variance component due to genus was zero (Table 4). Furthermore, the variance  
340 component attributed to genus x altitude interaction (32%) was lower than the residual (68%).  
341 Stomatal index was negatively-correlated with ED and GCL and positively-correlated with SD  
342 (Table S2).



343 **Table 4.** Estimates of variance components for random effects on stomatal traits in plant species of  
 344 tropical rainforests in Sri Lanka across an altitudinal gradient  
 345

| Effect              | GCL    | %  | SD      | %  | ED       | %  | SI     | %  | PCI    | %  |
|---------------------|--------|----|---------|----|----------|----|--------|----|--------|----|
| Genus               | 16.517 | 63 | 428810  | 64 | 12190137 | 56 | 0      | 0  | 2.341  | 4  |
| Genus x<br>Altitude | 6.678  | 26 | 68110   | 10 | 3178939  | 15 | 14.875 | 32 | 10.053 | 18 |
| Residual            | 2.982  | 11 | 169329  | 25 | 6212000  | 29 | 31.107 | 68 | 42.550 | 77 |
| ML                  | 5646.7 |    | 21193.9 |    | 26313.4  |    | 8965.3 |    | 9407.4 |    |
| AIC                 | 5652.7 |    | 21199.9 |    | 26319.4  |    | 8969.3 |    | 9413.4 |    |
| BIC                 | 5650   |    | 21197.2 |    | 26316.7  |    | 8967.5 |    | 9410.6 |    |

346 ML: -2Res Maximum Likelihood statistic; AIC: Akaike Information Criterion; BIC: Bayesian  
 347 Information Criterion.

348

349 Potential conductance index (PCI) showed a general decreasing trend with altitude (Fig. 2.e) which  
 350 confirmed the significance of the fixed effect of altitude (Table 3). Furthermore, PCI did not show  
 351 variance due to genus. The high PCI of *Calophyllum* at 1050 m, which was an exception to the  
 352 decreasing trend with altitude, occurred because of the high GCL of *C. acidus* (Fig. S1.a). Potential  
 353 conductance index was negatively-correlated with GCL (Table S2). PCI also showed a positive  
 354 correlation with SI and a negative correlation with ED, but both were very weak ( $r < 0.12$ ).

#### 355 *Variation of leaf structural traits of different genera with altitude*

356 Distributions of leaf mass per area (LMA) and leaf blade area (LBA) showed variation among  
 357 different species at each altitude (Fig. S2). A large majority of the species x altitude combinations  
 358 showed normal distributions in their LMA and LBA (Table S1) with very few outliers.

359 The fixed effect of altitude on LMA and LBA were highly-significant (Table 3). The random  
 360 effect of the genus did not contribute to variance of LMA (Table 5). In contrast, the variance due  
 361 to genus contributed 46% to the total variance of LBA. Leaf mass per area showed increasing  
 362 trends with altitude in all three genera (Fig. 3.a). In contrast, LBA of all genera showed decreasing

363 trends (Fig. 3.b). There was clear separation between genera with *Semecarpus* having greater LBA  
 364 than the other two.

365

366

367

368

369

370

371

372

373

374

375

376

377

378

379

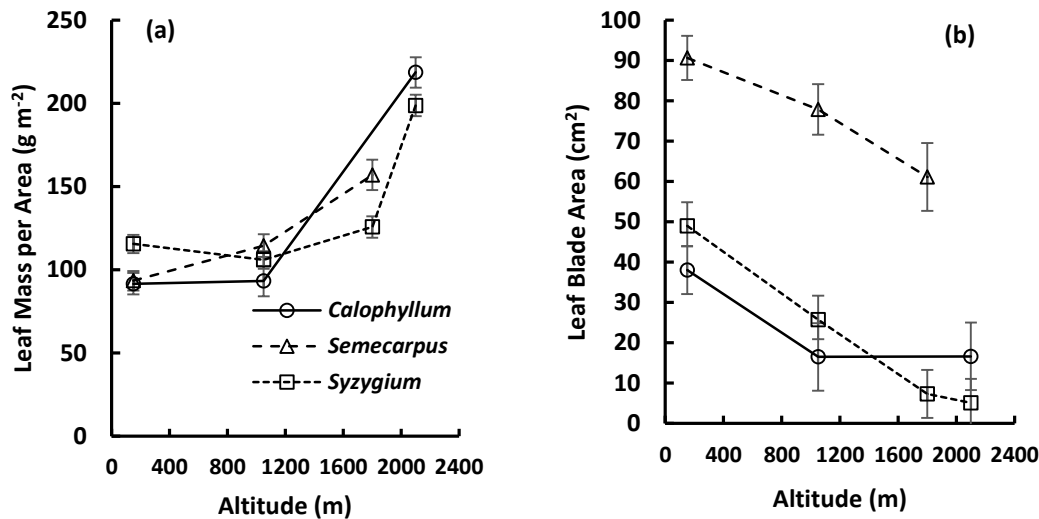

**Figure 3.** Variation of LS means of leaf structural properties of different plant genera with altitude: (a) Leaf mass per area; (b) Leaf blade area. Number of data points for each LS mean varied from 15 to 45.

**Table 5.** Estimates of variance components for random effects on leaf structural traits and nutrients in plant species of tropical rainforests in Sri Lanka along an altitudinal gradient

| Effect           | LMA    | %  | LBA    | %    | N     | %  | P     | %  | N:P   | %  |
|------------------|--------|----|--------|------|-------|----|-------|----|-------|----|
| Genus            | 0      | 0  | 892.6  | 45.9 | 0     | 0  | 8333  | 23 | 53.7  | 28 |
| Genus x Altitude | 156.9  | 11 | 1.44   | 0.1  | 0.574 | 14 | 0     | 0  | 0     | 0  |
| Residual         | 1242.5 | 89 | 1049.9 | 54.0 | 3.576 | 86 | 27304 | 77 | 140.9 | 72 |
| ML               | 2825.1 |    | 2777.6 |      | 244.6 |    | 731.9 |    | 434.8 |    |
| AIC              | 2829.1 |    | 2783.6 |      | 248.6 |    | 735.9 |    | 438.8 |    |
| BIC              | 2827.3 |    | 2780.9 |      | 246.8 |    | 734.1 |    | 437.0 |    |

383 ML: -2Res Maximum Likelihood statistic; AIC: Akaike Information Criterion; BIC: Bayesian  
 384 Information Criterion.

385

386 *Variation of leaf nutrients of different genera with altitude*

387 Distributions of leaf nitrogen (N) and phosphorus (P) concentrations and their ratio (N:P) showed  
388 variation among species and altitudes, especially in their spread (Fig. S3). However, all but one  
389 (N) or two (N:P) species showed normality in their distributions (Table S1). Because of the lower  
390 number of data points at the species level, distributions of leaf nutrients were examined at the  
391 genus level as well. The distributions of leaf nutrients of different genera showed a narrower  
392 spread, especially for P and N:P (Fig. S4). All but one (N:P) and two (P) distributions were normal  
393 (Table S3).

394 The fixed effect of altitude was significant ( $p < 0.05$ ) for leaf N, but non-significant for P and N:P  
395 (Table 3). The random effect of genus did not contribute to the variance of leaf N, but contributed  
396 23% and 28% respectively to the variances of P and N:P (Table 5). The random effect of genus x  
397 altitude did not contribute to the variances of P or N:P while contributing 14% to that of N.

398 All three genera showed increased leaf N from 150 m to 1050 m (Fig. 4), which was followed by  
399 decreases in *Calophyllum* and *Semecarpus* at higher altitudes. In *Syzygium*, leaf N continued to  
400 increase up to 1800 m, which was followed by a steep decline at 2100 m. Leaf P and N:P did not  
401 show consistent trends with altitude. Differences in leaf nutrients among genera were not  
402 consistent across altitudes. *Syzygium* had higher leaf N at 1800 m whereas *Semecarpus* had lower  
403 leaf P had 150 m. *Calophyllum* had higher leaf N:P at 150 m and 2100 m.

404

405

406

407

408

409

410

411

412

413

414

415

416

417

418

419

420

421

422

423

424

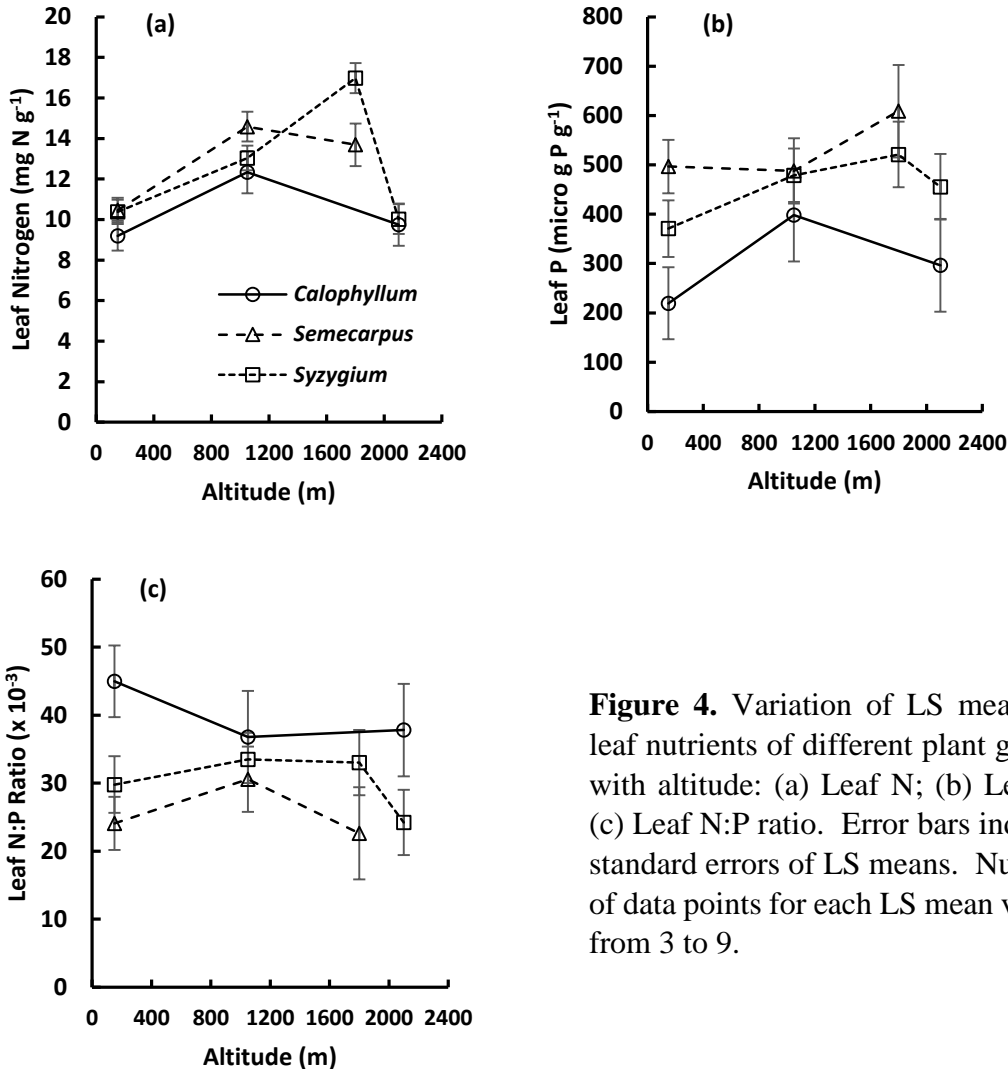

**Figure 4.** Variation of LS means of leaf nutrients of different plant genera with altitude: (a) Leaf N; (b) Leaf P; (c) Leaf N:P ratio. Error bars indicate standard errors of LS means. Number of data points for each LS mean varied from 3 to 9.

#### 418 *Inter-relationships among measured variables*

419 Table 6 shows the linear correlation matrix among species means of leaf stomatal and structural

420 traits and leaf nutrients. Guard cell length (GCL) showed significant ( $p < 0.05$ ) negative correlations

421 with SD and ED, but had a positive correlation with PCI. Stomatal density (SD) was positively

422 correlated with ED, which in turn was negatively correlated with SI. Except for a positive

423 correlation between ED and leaf N, there were no significant correlations between stomatal

424 anatomical traits and leaf nutrients.

425 **Table 6.** Linear correlation matrix of leaf traits, averaged for different plant species at different  
426 altitudes in tropical rainforests across an altitudinal gradient in Sri Lanka

| Trait | Pearson Correlation Coefficients ( <i>r</i> ), n = 20 |                          |                                |                                |                               |              |                                |                               |                               |                                |
|-------|-------------------------------------------------------|--------------------------|--------------------------------|--------------------------------|-------------------------------|--------------|--------------------------------|-------------------------------|-------------------------------|--------------------------------|
|       | Prob >   <i>r</i>   under H0: <i>r</i> = 0            |                          |                                |                                |                               |              |                                |                               |                               |                                |
|       | GCL                                                   | SD                       | ED                             | SI                             | PCI                           | LBA          | LMA                            | N                             | P                             | N:P                            |
| †GCL  | 1.00000                                               | <b>-0.792</b><br><.0001‡ | <b>-0.542</b><br><b>0.0135</b> | -0.214<br>ns                   | <b>0.706</b><br><b>0.0005</b> | 0.177<br>ns  | -0.329<br>ns                   | -0.371<br>ns                  | -0.391<br>ns                  | 0.068<br>ns                    |
| SD    | -                                                     | 1.000                    | <b>0.681</b><br><b>0.0009</b>  | 0.212<br>ns                    | -0.211<br>ns                  | -0.132<br>ns | -0.086<br>ns                   | 0.368<br>ns                   | 0.258<br>ns                   | 0.147<br>ns                    |
| ED    | -                                                     | -                        | 1.000                          | <b>-0.504</b><br><b>0.0234</b> | -0.114<br>ns                  | 0.114<br>ns  | -0.056<br>ns                   | <b>0.477</b><br><b>0.0333</b> | 0.358<br>ns                   | -0.114<br>ns                   |
| SI    | -                                                     | -                        | -                              | 1.000                          | -0.062<br>ns                  | -0.085<br>ns | 0.087<br>ns                    | -0.279<br>ns                  | -0.166<br>ns                  | 0.190<br>ns                    |
| PCI   | -                                                     | -                        | -                              | -                              | 1.000                         | 0.352<br>ns  | <b>-0.566</b><br><b>0.0093</b> | -0.360<br>ns                  | -0.291<br>ns                  | 0.067<br>ns                    |
| LBA   | -                                                     | -                        | -                              | -                              | -                             | 1.00000      | -0.328<br>ns                   | -0.103<br>ns                  | 0.226<br>ns                   | -0.357<br>ns                   |
| LMA   | -                                                     | -                        | -                              | -                              | -                             | -            | 1.000                          | -0.162<br>ns                  | -0.065<br>ns                  | -0.176<br>ns                   |
| N     | -                                                     | -                        | -                              | -                              | -                             | -            | -                              | 1.000                         | <b>0.612</b><br><b>0.0042</b> | -0.007<br>ns                   |
| P     | -                                                     | -                        | -                              | -                              | -                             | -            | -                              | -                             | 1.000                         | <b>-0.582</b><br><b>0.0071</b> |
| N:P   | -                                                     | -                        | -                              | -                              | -                             | -            | -                              | -                             | -                             | 1.000                          |

427 ‡Significant correlations are shown in bold.

428 †GCL - Guard cell length; SD – Stomatal density; ED – Epidermal density; SI – Stomatal index;  
429 PCI – Potential conductance index; LBA – Leaf blade area; LMA – Leaf mass per area; N – Leaf  
430 nitrogen concentration; P – Leaf phosphorus concentration; N:P – Leaf N:P ratio.

431

432 There was a highly-significant ( $p < 0.01$ ) negative correlation between LMA and PCI. Among the

433 leaf nutrients, N and P were positively correlated while leaf N:P was negatively correlated to leaf

434 P. Species means of ‘PNUE’ and ‘PPUE’ were negatively correlated to LMA (Fig. 5.a, b).

435 Strength of these correlations increased when species-level variation within each genus was

436 removed by averaging across species at each altitude (Fig. 5.c, d).

437

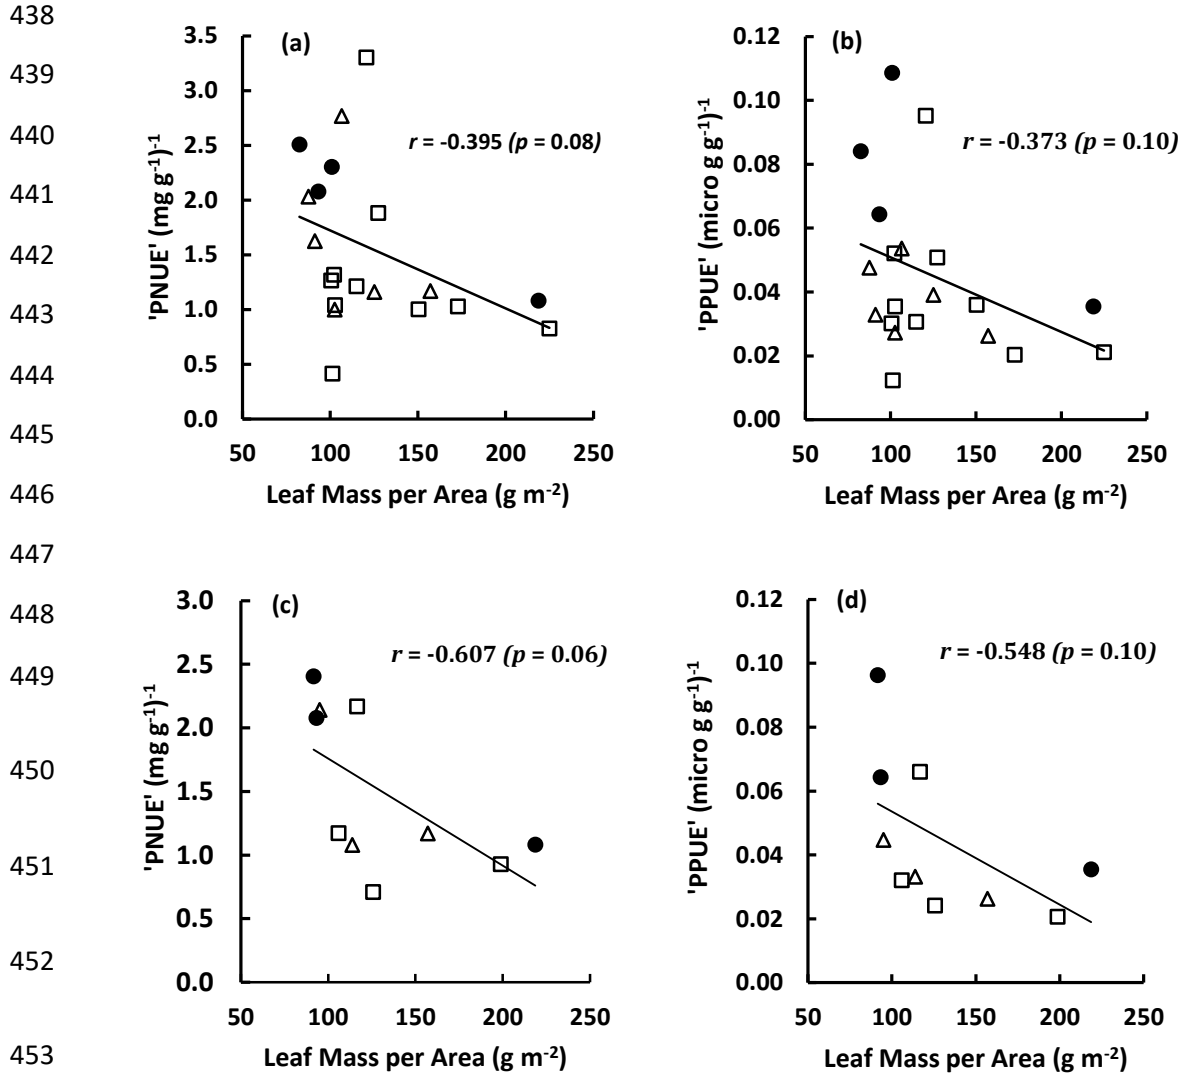

**Figure 5.** Correlation of proxy indices of photosynthetic nitrogen use efficiency ('PNUE') and phosphorus use efficiency ('PPUE') to leaf mass per area (LMA) of different plant species (a, b) and genera (c, d) in tropical rainforests in Sri Lanka across an altitudinal range from 150 m to 2100 m above sea level. ● - *Calophyllum*; Δ - *Semecarpus*; □ - *Syzygium*. 'PNUE' and 'PPUE' were calculated as the respective ratios of potential conductance index (unitless) and leaf N and P concentrations.

#### 457 Trends with key climatic variables

458 When the data from all species and altitudes were pooled, stomatal density (SD), guard cell length  
459 (GCL), epidermal density (ED) and stomatal index (SI) did not show significant ( $p > 0.05$ ) linear  
460 relationships with long-term mean air temperature ( $T_{AV}$ ), annual precipitation ( $R_F$ ) and daily solar

461 irradiance ( $S_R$ ). However, potential conductance index (PCI) showed highly-significant ( $p < 0.001$ )  
462 positive linear relationships with  $T_{AV}$ ,  $R_F$  and  $S_R$  (Fig. 6.a-c). Leaf mass per area (LMA) showed  
463 significant ( $p < 0.01$ ) negative linear relationships with  $T_{AV}$ ,  $R_F$  and  $S_R$  (Fig. 6.d-f).  
464 Because of the substantial variance component due to the random effect of genus (Table 5),  
465 relationships of LBA with climatic variables were examined separately for *Semecarpus* which had  
466 substantially higher LBA than *Calophyllum* and *Syzygium* (Fig. 3.b), whose LBA trends were  
467 examined together. Mean LBA of different *Semecarpus* species did not show significant trends  
468 with any of the climate variables (Fig. S5). However, when LBA of *Semecarpus* species at each  
469 altitude were averaged, the genus-level mean LBA of *Semecarpus* showed clear increasing trends  
470 with  $T_{AV}$ ,  $R_F$  and  $S_R$  (Fig. S6). Pooled species-level and genus-level LBA means of *Syzygium* and  
471 *Calophyllum* showed highly-significant ( $p < 0.01$ ) increasing trends with  $T_{AV}$ ,  $R_F$  and  $S_R$ .

472

473

474

475

476

477

478

479

480

481

482

483

484

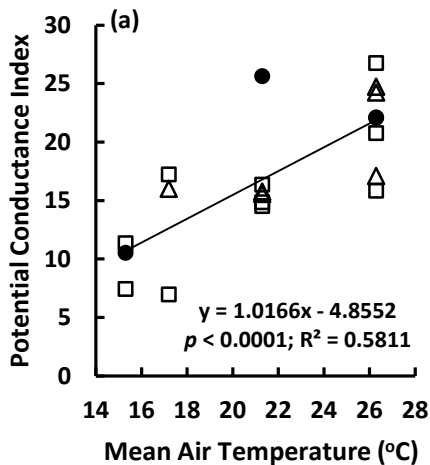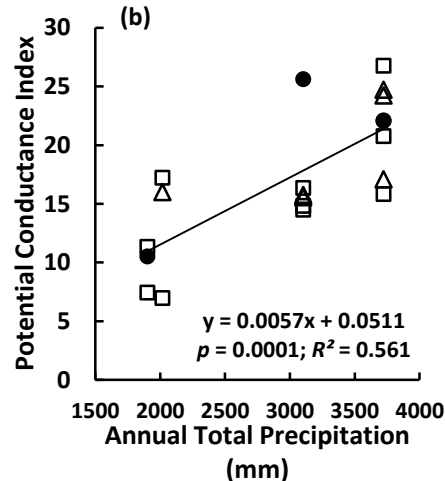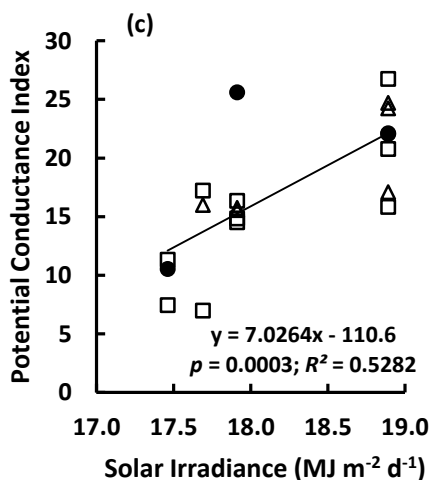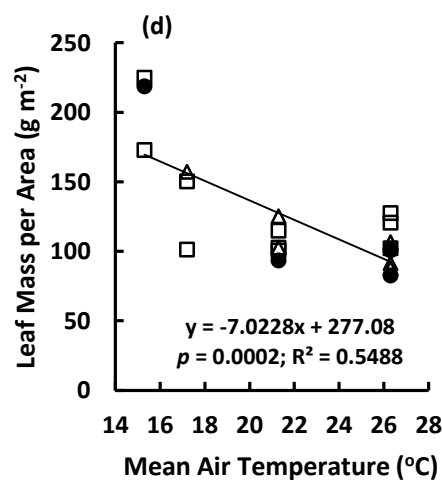

484  
485  
486  
487  
488  
489  
490  
491  
492  
493  
494

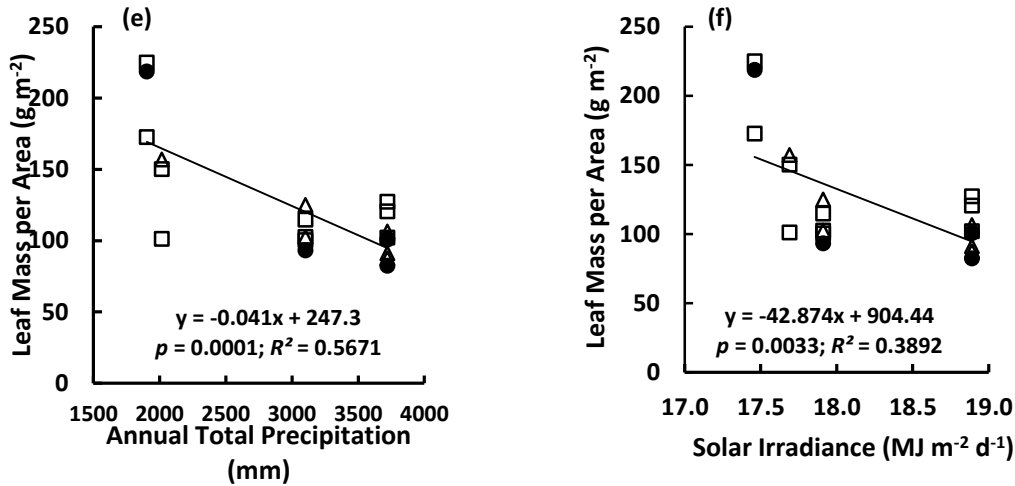

**Figure 6.** Variation of potential conductance index (a-c) and leaf mass per area (d-f) of different plant species with temperature (a, d), precipitation (b, e) and solar irradiance (c, f) in tropical rainforests in Sri Lanka across an altitudinal range from 150 m to 2100 m above sea level. ● - *Calophyllum*; Δ - *Semecarpus*; □ - *Syzygium*. Each data point is a species-level mean value.

495  
496  
497  
498  
499  
500

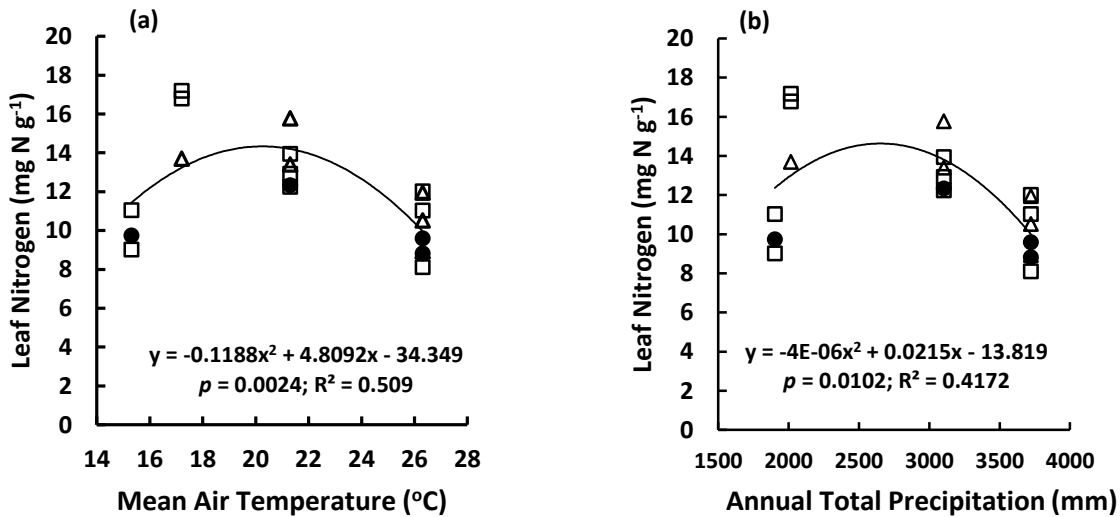

501  
502  
503  
504

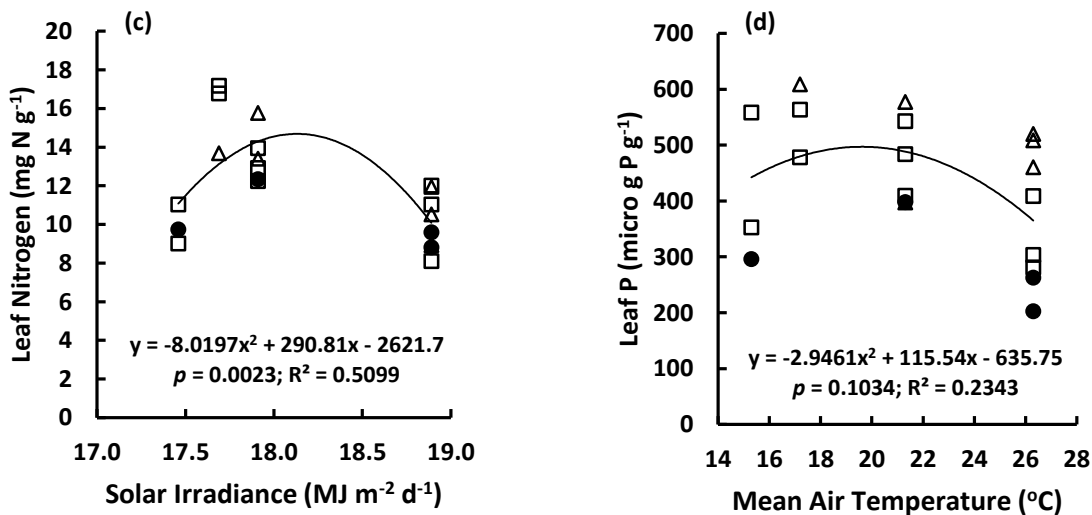



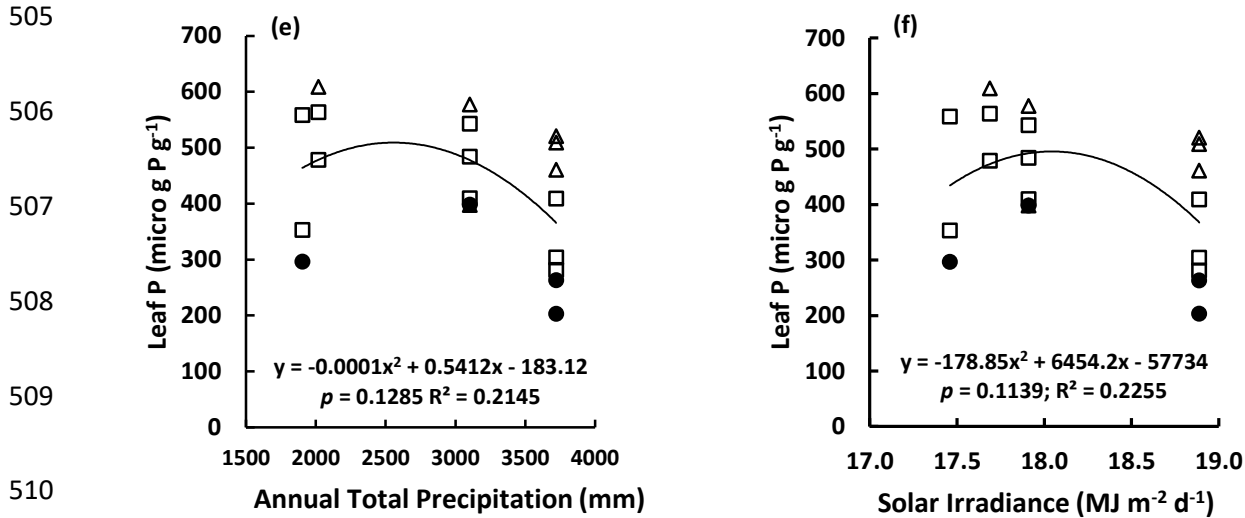

511 **Figure 7.** Variation of leaf nitrogen (a - c) and phosphorus (d - f) concentrations of different  
 512 plant species with temperature (a, d), precipitation (b, e) and solar irradiance (c, f) in tropical  
 rainforests in Sri Lanka across an altitudinal range from 150 m to 2100 m above sea level.

● - *Calophyllum*; Δ - *Semecarpus*; □ - *Syzygium*. Each data point is a species-level mean value.

513

514 Leaf N and P showed second-order polynomial trends with  $T_{AV}$ ,  $R_F$  and  $S_R$  (Fig. 7). Trends for  
 515 leaf P showed greater scatter (i.e. lower  $R^2$  values and greater  $p$ ) than those for leaf N. Leaf N:P  
 516 ratio did not show significant trends with any climate variable (data not shown). Proxy indices of  
 517 photosynthetic N and P use efficiencies (‘PNUE’ and ‘PPUE’) showed highly-significant positive  
 518 trends with  $T_{AV}$ ,  $R_F$  and  $S_R$  (Fig. 8).

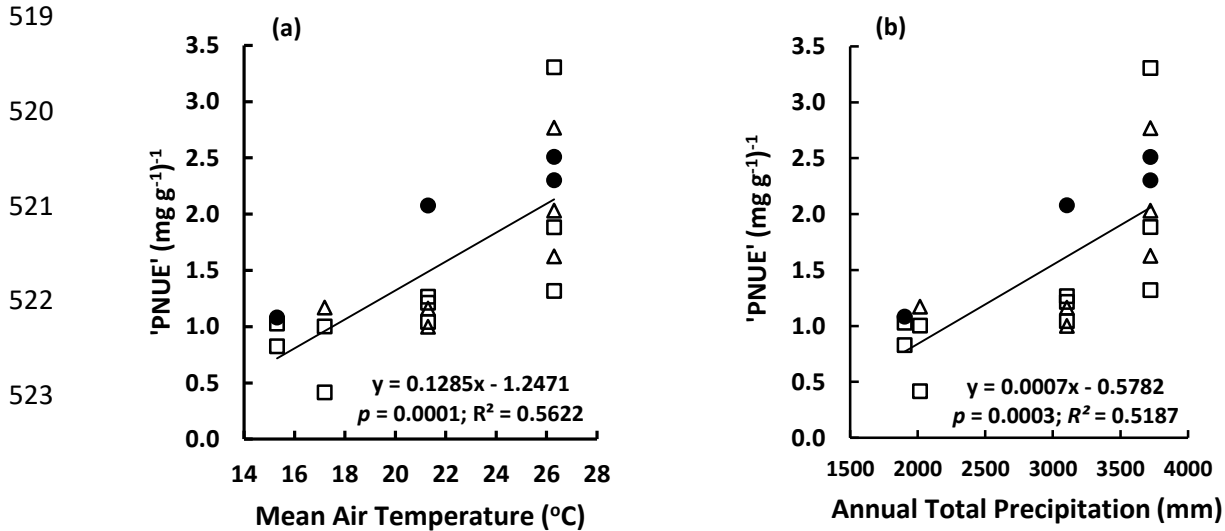

519

520

521

522

523

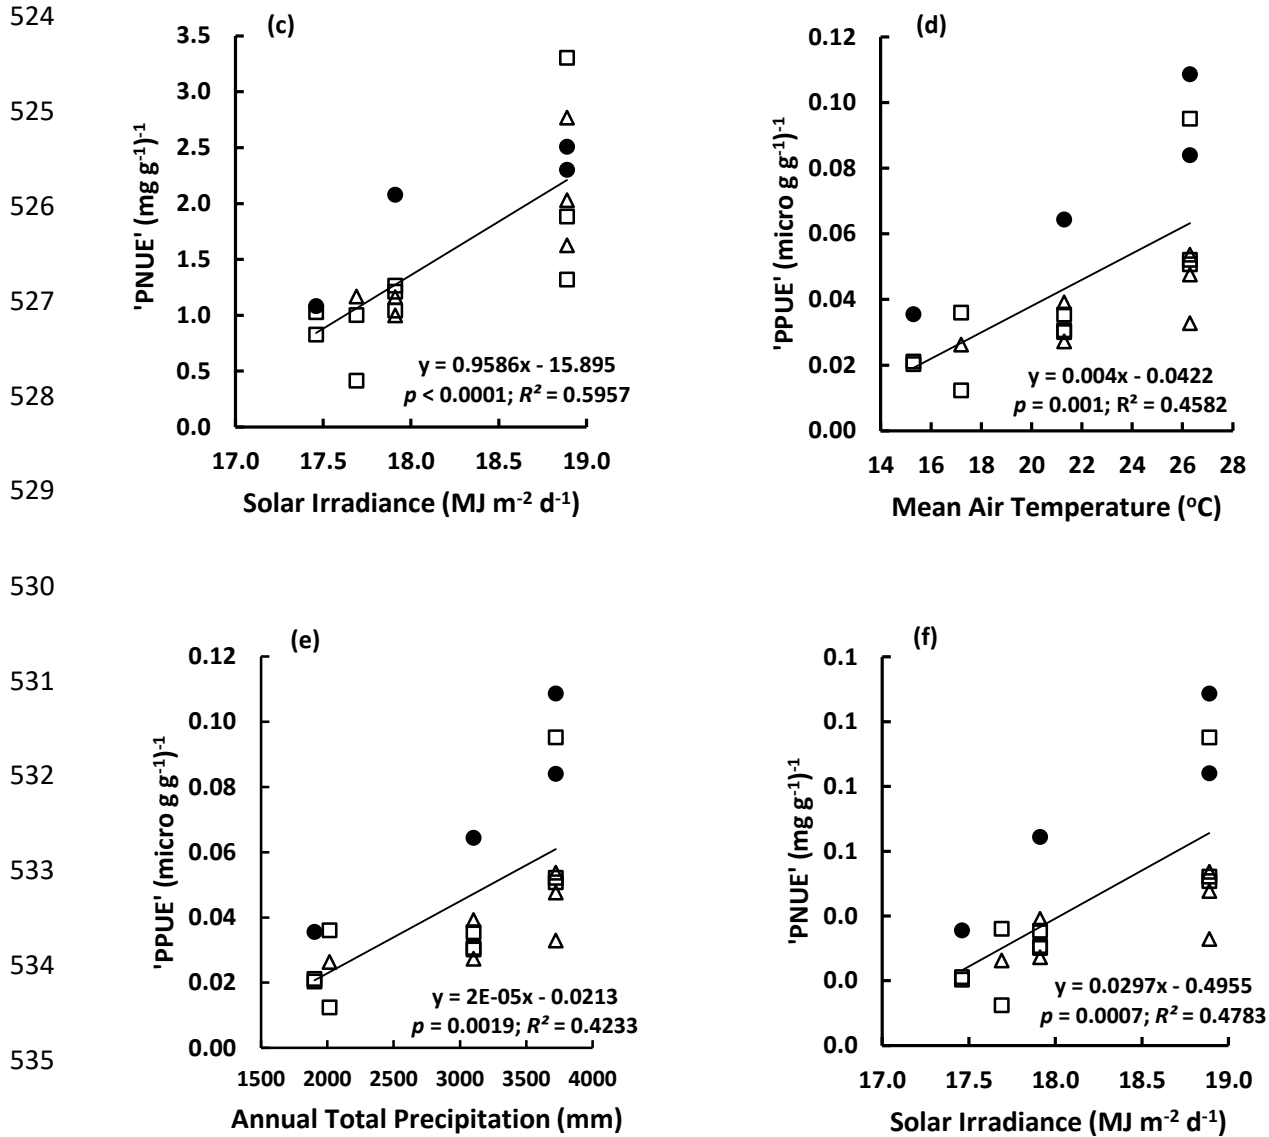

537 **Figure 8.** Variation of proxy indices of photosynthetic nitrogen use efficiency ('PNUE') and phosphorus  
 538 use efficiency ('PPUE') of different plant species with temperature (a, d), precipitation (b, e) and solar  
 irradiance (c, f) in tropical rainforests in Sri Lanka across an altitudinal range from 150 m to 2100 m above  
 sea level. ● - *Calophyllum*; Δ - *Semecarpus*; □ - *Syzygium*. Each data point is a species-level mean value.

539 *Factor analysis*

540 Four factors that had Eigen values greater than one were extracted initially and these accounted  
 541 for 82% of the total variance in leaf traits in different plant species. The rotated factor pattern,  
 542 following a varimax rotation, and the variables which loaded to each factor are given in Table 7.

543 A variable was considered to load on a factor if its loading on that factor is greater than 0.8 and if  
 544 the same variable does not load on another factor. Accordingly, two variables, namely, SD and  
 545 GCL, loaded on Factor 1, which accounted for 33% of the total variance of leaf traits. Leaf mass  
 546 per area and PCI loaded on Factor 2 (21% of total variance) while leaf N:P (16%) and SI (12%)  
 547 loaded on Factors 3 and 4 respectively.

548

549 **Table 7.** Rotated factor pattern for extracted factors in a factor analysis of leaf traits of plant species  
 550 distributed along an altitudinal gradient in tropical rainforests in Sri Lanka

| Variable                          | Loadings <sup>†</sup> of variables to factors |         |         |         |
|-----------------------------------|-----------------------------------------------|---------|---------|---------|
|                                   | Factor1                                       | Factor2 | Factor3 | Factor4 |
| Stomatal density (SD)             | 94*                                           | 3       | 11      | 16      |
| Epidermal density (ED)            | 73                                            | 9       | -11     | -48     |
| Leaf nitrogen (N)                 | 60                                            | -9      | -10     | -52     |
| Guard cell length (GCL)           | -83*                                          | 47      | 11      | -18     |
| Potential conductance index (PCI) | -34                                           | 84*     | 7       | 2       |
| Leaf mass per area (LMA)          | -14                                           | -86*    | -6      | 10      |
| Leaf N:P ratio                    | 10                                            | 14      | 90*     | 9       |
| Leaf blade area (LBA)             | -6                                            | 56      | -63     | 9       |
| Leaf phosphorus (P)               | 45                                            | -9      | -72     | -24     |
| Stomatal index (SI)               | 9                                             | -7      | 10      | 94*     |

551 <sup>†</sup>Multiplied by 100; \*Loadings greater than 0.8.

552

553 Figure 9 shows the distribution of different tree species in the factor space based on their rotated  
 554 factor scores for Factors 1 and 2. It can be observed that the three species found at 2100 m in  
 555 Pidurutalagala are located away from the rest (group A). Two of the three species at 1800 m in  
 556 Hakgala are located together (group B), but one (*Semecarpus obovata*) is located away from all  
 557 species in all locations. Out of the six species found at 1050 m in Sinharaja-Enasalwatte, the three  
 558 *Syzygium* species are located close to each other (group C). However, the two *Semecarpus* species

559

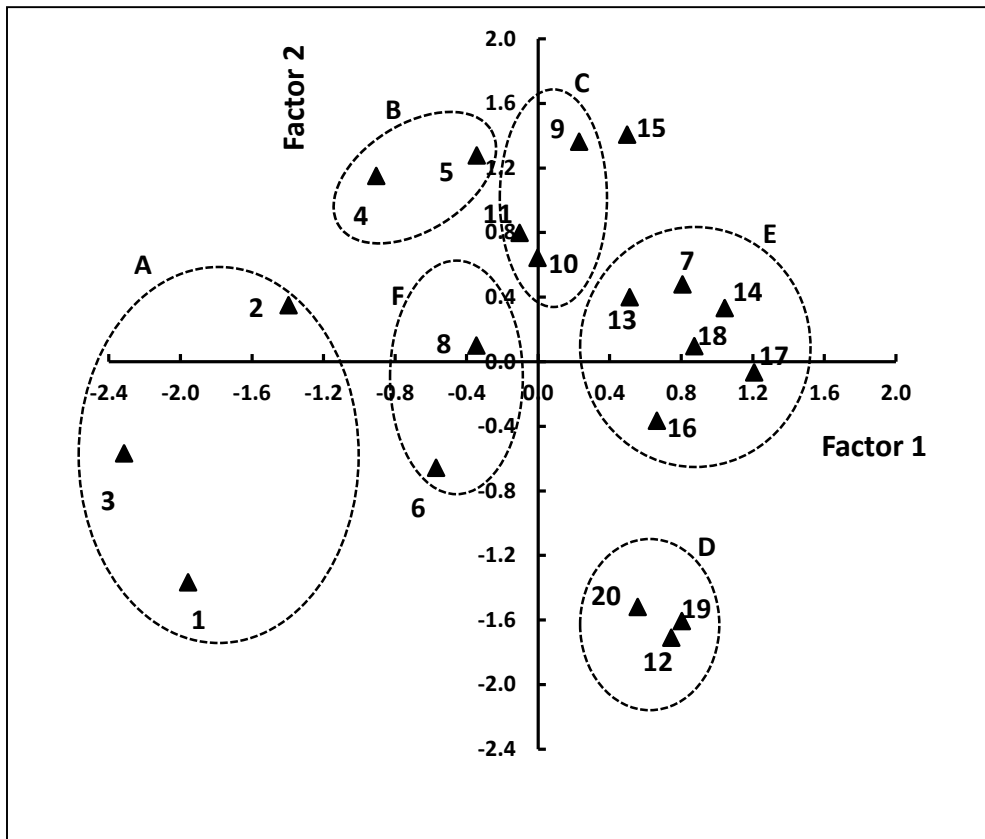

**Figure 9.** Distribution of plant species in factor space based on factor scores (after rotation) of Factors 1 and 2. 1 – 3: Species at 2100 m in Pidurutalagala; 4 – 6: Species at 1800 m in Hakgala; 7 – 12: Species at 1050 m Sinharaja-Enasalwatte; 13 – 20: Species at 150 m in Kanneliya. 1: *Calophyllum walkeri*; 2: *Syzygium rotundifolium*; 3: *Syzygium revolutum*; 4: *Syzygium zeylanicum*; 5: *Syzygium paniculatum*; 6: *Semecarpus obovata*; 7: *Semecarpus gardneri* (At Sin-Enasalwatte); 8: *Semecarpus parvifolia*; 9: *Syzygium cylindricum*; 10: *Syzygium micranthum*; 11: *Syzygium spp.*; 12: *Calophyllum acidus*; 13: *Syzygium alubo*; 14: *Syzygium firmum*; 15: *Syzygium neesianum*; 16: *Semecarpus gardneri* (At Kanneliya); 17: *Semecarpus subpeltata*; 18: *Semecarpus walkeri*; 19: *Calophyllum bracteatum*; 20: *Calophyllum cordato-oblongum*.

569 and the *Calophyllum* species are located away from the cluster formed by the three *Syzygium*  
570 species and from each other. A majority of the eight species found at 150 m in Kanneliya have  
571 formed two separate groups. One group (D) is formed by the two *Calophyllum* species (i.e. *C.*  
572 *bracteatum* and *C. cordata-oblongum*). Notably, *Calophyllum acidus* from Sinharaja-Enasalwatte  
573 also is located within this species group. All three *Semecarpus* species in Kanneliya are located  
574 within group E. Interestingly, *Semecarpus gardneri* in Sinharaja-Enasalwatte also is located in

575 group E so that *S. gardneri* in both locations is within the same species group. Two of the three  
576 *Syzygium* species in Kanneliya (*S. alubo* and *S. firmum*) are also located within group E along with  
577 the three *Semecarpus* species. Notably, the other *Syzygium* species in Kanneliya (*S. neesianum*)  
578 is located close to group C, which consists of the three *Syzygium* species in Sinharaja-Enasalwatte.  
579 *Semecarpus obovata* (at Hakgala) and *S. parvifolia* (at Sinharaja-Enasalwatte) which are located  
580 away from all other species at all locations form a final species group (F).

### 581 *Cluster analysis*

582 The dendrogram produced by cluster analysis of the leaf traits of different plant species using the  
583 complete linkage method is shown in Fig. 10. At a linkage distance of just above 0.5, six species  
584 clusters were identified. Multivariate analysis of variance (MANOVA) showed that the six  
585 clusters were significantly different (Wilks' Lambda Statistic = 0.00000956,  $p < 0.0001$ ). Notably,  
586 all four *Calophyllum* species across the altitudinal range from 150 m to 2100 m grouped in to  
587 Cluster 2. Cluster 1 consists of two sub-clusters, one having two *Semecarpus* species and the other  
588 having three *Syzygium* species. It is notable that the species in both these sub-clusters come from  
589 different altitudes. Cluster 3 has two *Syzygium* species from 2100 m and 1800 m, along with a  
590 *Semecarpus* species from 150 m. Cluster 4 consists of two *Syzygium* species, one from 1050 m  
591 and the other from 150 m. Cluster 5 has three *Syzygium* species from three different altitudes (i.e.  
592 1800 m, 1050 m and 150 m) and one *Semecarpus* species from 1050 m. Lastly, Cluster 6 has two  
593 *Semecarpus* species from 150 m. Therefore, while all *Calophyllum* species have grouped into one  
594 cluster, there has been mixing between *Syzygium* and *Semecarpus* species during clustering. In all  
595 three genera, species from different altitudes have come together in common clusters.

596

597

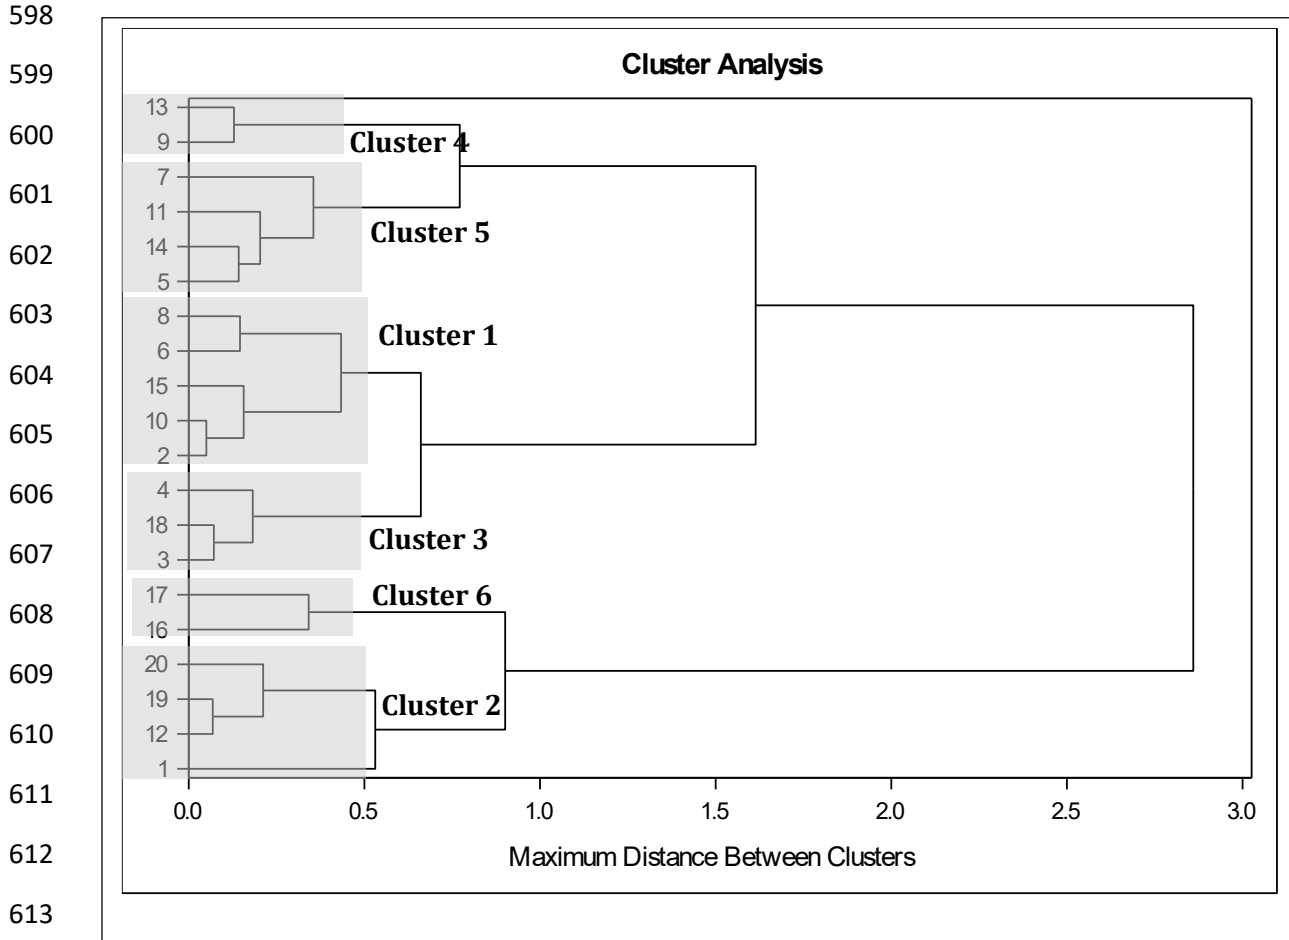

615 **Figure 10.** Dendrogram of cluster analysis based on leaf traits of plant species from three genera in  
616 permanent sampling plots within tropical rainforests along an altitudinal gradient in Sri Lanka. 1 – 3:  
617 Species at 2100 m asl in Pidurutalagala; 4 – 6: Species at 1800 m in Hakgala; 7 – 12: Species at 1050 m in  
618 Sinharaja-Enasalwatte; 13 -20: Species at 150 m in Kanneliya. 1: *Calophyllum walkeri*; 2: *Syzygium*  
619 *rotundifolium*; 3: *Syzygium revolutum*; 4: *Syzygium zeylanicum*; 5: *Syzygium paniculatum*; 6: *Semecarpus*  
620 *obovata*; 7: *Semecarpus gardneri* (In Sin-Enasalwatte); 8: *Semecarpus parvifolia*; 9: *Syzygium cylindricum*;  
621 10: *Syzygium micranthum*; 11: *Syzygium spp.*; 12: *Calophyllum acidus*; 13: *Syzygium alubo*; 14: *Syzygium*  
622 *firmum*; 15: *Syzygium neesianum*; 16: *Semecarpus gardneri* (In Kanneliya); 17: *Semecarpus subpeltata*;  
623 18: *Semecarpus walkeri*; 19: *Calophyllum bracteatum*; 20: *Calophyllum cordato-oblongum*. Six clusters  
624 are identified by hatched boxes.

625

## 626 Discussion

627 We discuss the above results in terms of how they have provided answers to the questions that we  
628 posed at the beginning of this work.

629 *Do the altitudinal responses of stomatal traits vary for different taxa?*

630 As the genus x altitude interaction did not account for a substantial variance component in any of  
631 the stomatal traits (Table 4), our results do not support the hypothesis that the altitudinal variation  
632 of individual stomatal anatomical traits is different among different taxa in TRFSL. Out of the  
633 stomatal traits, only PCI, a composite trait combining the effects of stomatal size (GCL) and  
634 density (SD) in determining leaf gas exchange capacity, and a proxy for photosynthetic capacity  
635 (Wong et al. 1979, Farquhar and Sharkey 1982) showed variation with altitude (Table 3). It is  
636 notable that neither the genus nor genus x altitude interaction contributed appreciably to the total  
637 variance of PCI, thus indicating that the observed altitudinal response of PCI is common for  
638 different taxa. Interestingly, the two component traits of PCI (i.e. GCL and SD) show substantial  
639 variation among genera (Table 4) while not responding to altitudinal variation. Therefore, our  
640 observation of a common altitudinal response of PCI supports a hypothesis that the genetically  
641 diverse altitudinal responses of individual stomatal traits are part of an integrated altitudinal  
642 response in the leaf gas exchange capacity.

643 *Are the altitudinal responses of different leaf traits linked in an integrated/coordinated response?*

644 Among the other leaf traits, LMA, LBA and leaf N showed significant altitudinal trends (Table 3).  
645 Despite LBA showing an appreciable variance component due to genus, the altitudinal trends of  
646 the above three traits did not show variation among the three genera (Table 4, Figs. 3, 4). This  
647 affirmed the absence of evidence to support Hypothesis 1 with regard to leaf structural traits and  
648 key nutrients. However, two of our observations support the hypothesis that the altitudinal  
649 responses of different leaf traits are interlinked across different taxa to form a coordinated response  
650 across different taxa) (Hypothesis 2). One is the significant negative correlation between PCI and  
651 LMA (Table 6). The other is the result from factor analysis where PCI and LMA formed one of

652 the two major variable constructs that explained the observed variance of leaf traits (Table 7). The  
653 negative correlation between PCI and LMA is mechanistically plausible. Increasing LMA  
654 indicates greater investment of biomass per unit leaf area, especially in structural tissue, thus  
655 enabling a longer leaf lifespan. The leaf economic spectrum (Wright et al. 2004, Onoda and  
656 Wright 2018) specifies that greater investment in leaf structure is accompanied by lower  
657 investment in photosynthetic machinery, which entails a ‘slower return’ in terms of assimilate  
658 production. Lower photosynthetic capacity does not require a high CO<sub>2</sub> absorption capacity via a  
659 higher stomatal conductance. As PCI can be considered as the maximum possible stomatal  
660 conductance ( $g_{\max}$ ), it is physiologically plausible that photosynthetic capacity and  $g_{\max}$  are  
661 negatively correlated to greater investment in leaf structural tissue (i.e. higher LMA) and longer  
662 leaf lifespan.

663 We find only partial evidence that variation of N and P across altitudes, their associated climatic  
664 parameters and genera is part of a coordinated response along with stomatal anatomical and leaf  
665 structural traits. For example, we could expect leaf N to be positively correlated to PCI if higher  
666 leaf N has resulted in greater investment of N in photosynthetic machinery (e.g. Rubisco).  
667 Similarly, a positive correlation could be expected between PCI and leaf P, if higher leaf P  
668 indicates greater investment in energy storage molecules such as ATP and NADPH. Across the  
669 whole range of altitudes in our study, leaf N and P were not significantly correlated to PCI (Table  
670 7). However, both leaf N and P, which had shown increases from low (150 m) to mid (1050 m)  
671 altitude, showed decreases from mid- to high (> 1800 m) altitudes (Fig. 4) where parallel decreases  
672 have occurred in PCI as well (Fig. 2). Therefore, the reductions in N and P from mid- to high  
673 altitudes could be due to down-regulation of photosynthetic capacity, as shown by decreased PCI.  
674 Based on global scale studies, leaf N and P were also expected to be negatively correlated to LMA



675 as greater investment in leaf structural tissue in the high-LMA leaves would mean reduced  
676 allocation of N and P to leaves. However, across the whole range of altitudes we have not found  
677 significant correlations between LMA and leaf nutrients. On the other hand, the expected strong  
678 negative correlations are found between LMA and leaf nutrients from mid- to high altitudes.  
679 Therefore, our results suggest that leaf nutrients vary as part of integrated/coordinated leaf trait  
680 response at lower temperature and rainfall regimes (i.e. mid- to high altitudes), but not at higher  
681 temperature and rainfall regimes (i.e. low altitudes). Shifts in trait relationships with variation in  
682 climate have been observed by (Wright et al. 2005).

683 Examination of trait relationships and climate responses of nutrient use efficiencies of our data  
684 provide evidence for leaf nutrients also being part of a coordinated response in concert with  
685 stomatal anatomical and leaf structural traits. Both ‘PNUE’ and ‘PPUE’ showed negative  
686 correlations with LMA (Fig. 8). As suggested by Onoda and Wright (2018), allocation of a higher  
687 proportion of leaf N and P to structural tissue could have caused these reductions in ‘nutrient use  
688 efficiencies’ with LMA. Furthermore, the positive relationships of ‘PNUE’ and ‘PPUE’ with  $T_{AV}$ ,  
689  $R_F$  and  $S_R$  (Fig. 8) are in accordance with a strategy of increased investment of N and P in  
690 photosynthetic machinery in higher temperature and precipitation environments where LMA is  
691 lower and photosynthetic capacity is higher (Fig. 6).

692 *How strong is the influence of climate variation across altitudinal gradients on responses of leaf*  
693 *traits to altitude?*

694 Assessing the influence of climatic variation across the altitudinal gradient on leaf traits and their  
695 associations is constrained in our work by the limited number of data points (i.e. four altitudes).  
696 However, the strong trends of PCI (positive, Figs. 6.a-c) and LMA (negative, Figs. 6.d-f) with  
697 temperature ( $T_{AV}$ ), precipitation ( $R_F$ ) and incident solar radiation ( $S_R$ ) indicate significant

698 environmental control over key leaf traits. The absence of a genus level effect as shown by its  
699 very low variance component (Tables 4, 5) show that climatic factors exert an influence that  
700 overrides genetic variation. Mechanistic explanations are available for the observed trends  
701 between the above leaf traits and climatic factors. Increase of PCI with increasing  $R_F$  agrees with  
702 the tight control exerted by water availability on leaf gas exchange capacity. Species in sites of  
703 higher precipitation have evolved greater gas exchange capacity (i.e. higher PCI), probably to  
704 maximize carbon assimilation without being constrained by the possibility of water stress due to  
705 excessive transpiration. It is possible that the higher PCI at higher  $R_F$  sites is the result of a  
706 combination of climatic factors that favour higher assimilation rates. This is because in the present  
707 study, higher  $R_F$  at lower altitudes (e.g. 150 m) is accompanied by higher  $T_{AV}$ ,  $S_R$  and  $pCO_2$ , as  
708 can be assumed with higher WVP, (Table 1), all of which promote photosynthesis. In contrast, as  
709  $R_F$  declined progressively with increasing altitude, the lower  $R_F$  sites are at higher altitudes where  
710  $T_{AV}$ ,  $S_R$  and  $pCO_2$  also are lower. The lower  $T_{AV}$ ,  $T_{min}$  and  $T_{max}$  levels at higher altitudes of the  
711 present study are more likely than their  $R_F$  to impose limitations on photosynthesis (James et al.  
712 1994, Cabrera et al. 1998, Zhang et al. 2005). Therefore, it is possible that the lower PCI at the  
713 lower  $R_F$  sites have occurred more as a response to decreased photosynthetic potential at lower  
714 temperatures than a response to lower  $R_F$ .

715 The negative trends of LMA with  $T_{AV}$ ,  $R_F$  and  $S_R$  (Fig. 6) indicate increased allocation of leaf  
716 biomass per unit leaf area. While the negative trend with  $R_F$  agrees with the broader global trend,  
717 the decrease of LMA with increasing  $T_{AV}$  is opposite to the trend shown with a broader range of  
718 plant species and climates (Wright et al. 2004, 2005). However, when the trend for evergreens is  
719 separated from the global trend (Wright et al. 2005), it agrees with that observed in our study. It  
720 is possible that the increase of LMA with decreasing  $R_F$  and  $T_{AV}$  is a consequence of restrictions

721 imposed by both these climatic variables on LBA. In all three genera, LBA decreased with  
722 decreasing  $R_F$  and  $T_{AV}$  (Figs. S5, S6) probably because of their effects on leaf cell division (CDR)  
723 and expansion rates (CER). There is ample evidence from agricultural crops that in plant tissues  
724 growing without water deficits, both leaf CDR and CER increases with increasing temperature  
725 above a base temperature (Squire and Ong 1983, Squire 1990, Chapman et al. 1993, Salah and  
726 Tardieu 1996, Tardieu et al. 2005). Furthermore, CDR and CER are highly-sensitive to water  
727 availability, showing reduction with water deficit (Squire et al. 1983, Ong et al. 1985, Granier and  
728 Tardieu 1999, Tardieu et al. 2000, 2005, Chenu et al. 2008). It is highly-likely that these effects  
729 on CDR and CER have combined to decrease LBA with decreasing  $T_{AV}$  and  $R_F$  along the  
730 altitudinal gradient in our study (Figs. S5, S6). Such a restriction of LBA would concentrate the  
731 biomass allocated to leaves within a smaller area, thus causing the observed increase of LMA with  
732 decreasing  $T_{AV}$  and  $R_F$ . This increase of LMA is in agreement with the observed trend of thicker  
733 and leathery leaves in environments with lower  $R_F$  and with longer leaf lifespans (LL) in cooler  
734 and drier environments (Niinemets 2001, Wright et al. 2001, 2004). This trend is also in  
735 accordance with an integrated response, which includes the observed reduction of PCI and  
736 photosynthetic capacity with decreasing  $T_{AV}$ ,  $R_F$  and  $S_R$ . Even though photosynthesis was not  
737 measured in the present study, mass-based photosynthetic capacity has been shown to decline with  
738 increasing LMA (Osnas et al. 2013, Onoda and Wright 2018). Therefore, the highly-significant  
739 negative correlation between PCI and LMA observed in our study (Table 6) is mechanistically  
740 plausible and is in agreement with the global trends.

741 The highly-significant positive correlation between leaf N and P is in agreement with global scale  
742 observations (Wright et al. 2004, Reich and Oleksyn 2004, Osnas et al. 2013, Onoda and Wright  
743 2018). The second-order polynomial trends of leaf N and P with  $T_{AV}$  (Fig. 7) are similar to the

744 global-scale patterns for a wider range of species and climates (Reich and Oleksyn 2004). The  
745 absence of a response to climatic factors in leaf N:P ratio indicates that the responses of N and P  
746 to climate variation occurs in a way that N:P is conserved across different climates. This is  
747 confirmed by N:P being extracted as one of the underlying variable constructs influencing the  
748 variation of leaf traits across species, genera and climates.

749 *Evidence from factor analysis for an integrated/coordinated altitudinal response*

750 We preferred to perform a factor analysis instead of a principal component analysis because of our  
751 assumption based on previous work (Wright et al. 2004, Onoda and Wright 2018) that there is an  
752 underlying structure of trait assemblies (i.e. underlying variable constructs) that causes the  
753 observed variation of leaf traits across altitudes, genera and species (Child 1990, Suhr 2005). The  
754 four extracted factors, which accounted for 82% of the variance of measured leaf traits, represented  
755 physiologically-meaningful trait assemblies. Factor 1, composed of SD and GCL, constituted an  
756 underlying composite factor incorporating two properties that determine the abundance of stomata  
757 on the leaf surface and their size. Factor 2, being loaded by PCI and LMA, clearly constituted the  
758 leaf economic spectrum (Wright et al. 2004). Factor 3 constituted an underlying factor based on  
759 leaf nutrient contents, the leaf N:P ratio. Stomatal index, a measure of the fraction of stomata  
760 relative to the total cell population on the leaf surface, formed the fourth underlying factor. The  
761 distribution of different plant species and genera in the factor space of Factors 1 and 2 did not  
762 show a clear separation of species or genera. This confirms that the influence of underlying factors  
763 runs across taxonomic boundaries. This is confirmed by the clustering of species in cluster  
764 analysis, where except for the four *Calophyllum* species, there was considerable mixing of species  
765 of *Syzygium* and *Semecarpus* from different altitudes.

766

767 **Conclusions**

768 We, therefore, conclude that: (a) the response of stomatal anatomy to altitude does not differ  
769 among taxa of trees in TRFs; (b) the altitudinal responses of leaf structural traits and major nutrient  
770 concentrations are interlinked in a coordinated response across different taxa; and (c) climate  
771 exerts a strong influence on the variation of leaf traits to environmental gradients, which spans  
772 across taxonomic boundaries of species and genera. We also find evidence that the coordinated  
773 response of leaf traits to climate variation is in accordance with the leaf economics spectrum.  
774 These findings have important implications on how leaf traits and their responses to climate  
775 variations are represented in dynamic vegetation models to predict the response of TRFs to future  
776 climate change.

777

778 **Supplementary data**

779 Supplementary data of this article is available separately.

780

781 **Conflict of interest**

782 All authors declare no conflict of interest.

783

784 **Funding**

785 This work was funded by a research grant from the National Science Foundation of Sri Lanka  
786 (NTRP/2017/CC&ND/TA-04/P-01/01) in the thematic research program on climate change and  
787 natural disasters.

788 **Acknowledgements**

789 We thank the Departments of Forest Conservation and Wildlife Conservation, Sri Lanka for  
790 logistical support, Gemunu Wijesooriya for assistance in leaf nutrient analysis and Chameesha  
791 Madhumali, Dineth Dhanushka and Suneth Kanishka for field assistance.

792

793 **Authors' contributions**

794 JC, IC and BW conceptualized and designed the work. NS and DS established permanent  
795 sampling plots and carried out the plant census, with assistance from HJ and AW in taxonomic  
796 identification and description. BW collected leaf samples and carried out all measurements under  
797 the supervision of IC. JC, IC and BW did the statistical analysis of data. JC wrote the paper with  
798 assistance from IC, AW and BW. IC and BW reviewed the initial draft and IC reviewed the final  
799 draft.

800

801 **References**

802 Aiba S-I, Kitayama K (1999) Structure, composition and species diversity in an altitude-substrate  
803 matrix of rain forest tree communities on Mount Kinabalu, Borneo. *Plant Ecol* 140:139–157.

804 Angiosperm Phylogeny Group (2009) An update of the Angiosperm Phylogeny Group  
805 classification for the orders and families of flowering plants: APG III. *Bot J Linn Soc*  
806 161:105–121.

807 Ashton PS (1981) Myrtaceae. In: Dassanayake MD, Fosberg FR (eds) *A Revised Handbook to the*

- 808 Flora of Ceylon: Volume II. Amerind, New Delhi
- 809 Bai Y-J, Chen L-Q, Ranhotra PS, Wang Q, Wang Y-F, Li C-S (2015) Reconstructing atmospheric  
810 CO<sub>2</sub> during the Plio-Pleistocene transition by fossil *Typha*. *Glob Chang Biol* 21:874–881.
- 811 Barry RG (1992) *Mountain Weather and Climate*. Psychology Press.
- 812 Cabrera HM, Rada F, Cavieres L (1998) Effects of temperature on photosynthesis of two  
813 morphologically contrasting plant species along an altitudinal gradient in the tropical high  
814 Andes. *Oecologia* 114:145–152.
- 815 Caldera HIU, De Costa WAJM, Woodward FI, Lake JA, Ranwala SMW (2017) Effects of elevated  
816 carbon dioxide on stomatal characteristics and carbon isotope ratio of *Arabidopsis thaliana*  
817 ecotypes originating from an altitudinal gradient. *Physiol Plant* 159:74–92.
- 818 Chapman SC, Hammer GL, Palta JA (1993) Predicting leaf area development of sunflower. *Field*  
819 *Crops Res* 34:101–112.
- 820 Chenu K, Chapman SC, Hammer GL, Mclean G, Salah HBH, Tardieu F (2008) Short-term  
821 responses of leaf growth rate to water deficit scale up to whole-plant and crop levels: an  
822 integrated modelling approach in maize. *Plant, Cell & Environment* 31:378–391.
- 823 Child D (1990) *The essentials of factor analysis*. Cassell Educational.
- 824 Dieleman WIJ, Venter M, Ramachandra A, Krockenberger AK, Bird MI (2013) Soil carbon stocks  
825 vary predictably with altitude in tropical forests: Implications for soil carbon storage.  
826 *Geoderma* 204-205:59–67.
- 827 Doheny-Adams T, Hunt L, Franks PJ, Beerling DJ, Gray JE (2012) Genetic manipulation of

- 828 stomatal density influences stomatal size, plant growth and tolerance to restricted water  
829 supply across a growth carbon dioxide gradient. *Philos Trans R Soc Lond B Biol Sci*  
830 367:547–555.
- 831 Farquhar GD, Sharkey TD (1982) Stomatal conductance and photosynthesis. *Annu Rev Plant*  
832 *Physiol* 33:317–345.
- 833 Fick SE, Hijmans RJ (2017) WorldClim 2: new 1-km spatial resolution climate surfaces for global  
834 land areas. *Int J Climatol* 37:4302–4315.
- 835 Franks PJ, Beerling DJ (2009) Maximum leaf conductance driven by CO<sub>2</sub> effects on stomatal size  
836 and density over geologic time. *Proc Natl Acad Sci USA* 106:10343–10347.
- 837 Givnish TJ (1999) On the causes of gradients in tropical tree diversity. *J Ecol* 87:193–210.
- 838 Granier C, Tardieu F (1999) Water deficit and spatial pattern of leaf development. Variability In  
839 responses can Be simulated using a simple model of leaf development. *Plant Physiol*  
840 119:609–620.
- 841 Haworth M, Killi D, Materassi A, Raschi A (2015) Coordination of stomatal physiological  
842 behavior and morphology with carbon dioxide determines stomatal control. *Am J Bot*  
843 102:677–688.
- 844 Hofhansl F, Chacón-Madriral E, Fuchslueger L, Jenking D, Morera-Beita A, Plutzer C, Silla F,  
845 Andersen KM, Buchs DM, Dullinger S, Fiedler K, Franklin O, Hietz P, Huber W, Quesada  
846 CA, Rammig A, Schrodte F, Vincent AG, Weissenhofer A, Wanek W (2020) Climatic and  
847 edaphic controls over tropical forest diversity and vegetation carbon storage. *Sci Rep*



848 10:5066.

849 Holland N, Richardson AD (2009) Stomatal Length Correlates with Elevation of Growth in Four  
850 Temperate Species†. *J Sustainable For* 28:63–73.

851 Hubau W, Lewis SL, Phillips OL, Affum-Baffoe K, Beeckman H, Cuní-Sanchez A, Daniels AK,  
852 Ewango CEN, Fauset S, Mukinzi JM, Sheil D, Sonké B, Sullivan MJP, Sunderland TCH,  
853 Taedoumg H, Thomas SC, White LJT, Abernethy KA, Adu-Bredu S, Amani CA, Baker TR,  
854 Banin LF, Baya F, Begne SK, Bennett AC, Benedet F, Bitariho R, Bocko YE, Boeckx P,  
855 Boundja P, Brienen RJW, Brncic T, Chezeaux E, Chuyong GB, Clark CJ, Collins M,  
856 Comiskey JA, Coomes DA, Dargie GC, de Haulleville T, Kamdem MND, Doucet J-L,  
857 Esquivel-Muelbert A, Feldpausch TR, Fofanah A, Foli EG, Gilpin M, Gloor E, Gonmadje C,  
858 Gourlet-Fleury S, Hall JS, Hamilton AC, Harris DJ, Hart TB, Hockemba MBN, Hladik A,  
859 Ifo SA, Jeffery KJ, Jucker T, Yakusu EK, Kearsley E, Kenfack D, Koch A, Leal ME, Levesley  
860 A, Lindsell JA, Lisingo J, Lopez-Gonzalez G, Lovett JC, Makana J-R, Malhi Y, Marshall  
861 AR, Martin J, Martin EH, Mbayu FM, Medjibe VP, Mihindou V, Mitchard ETA, Moore S,  
862 Munishi PKT, Bengone NN, Ojo L, Ondo FE, Peh KS-H, Pickavance GC, Poulsen AD,  
863 Poulsen JR, Qie L, Reitsma J, Rovero F, Swaine MD, Talbot J, Taplin J, Taylor DM, Thomas  
864 DW, Toirambe B, Mukendi JT, Tuagben D, Umunay PM, van der Heijden GMF, Verbeeck  
865 H, Vleminckx J, Willcock S, Wöll H, Woods JT, Zemagho L (2020) Asynchronous carbon  
866 sink saturation in African and Amazonian tropical forests. *Nature* 579:80–87.

867 Hultine KR, Marshall JD (2000) Altitude trends in conifer leaf morphology and stable carbon  
868 isotope composition. *Oecologia* 123:32–40.

869 Hu J-J, Xing Y-W, Turkington R, Jacques FMB, Su T, Huang Y-J, Zhou Z-K (2015) A new

- 870 positive relationship between pCO<sub>2</sub> and stomatal frequency in *Quercus guyavifolia*  
871 (Fagaceae): a potential proxy for palaeo-CO<sub>2</sub> levels. *Ann Bot* 115:777–788.
- 872 James JC, Grace J, Hoad SP (1994) Growth and Photosynthesis of *Pinus Sylvestris* at its  
873 Altitudinal Limit in Scotland. *J Ecol* 82:297–306.
- 874 Körner C (2007) The use of ‘altitude’ in ecological research. *Trends Ecol Evol* 22:569–574.
- 875 Korner CK, Bannister P, Mark AF (1986) Altitudinal variation in stomatal conductance, nitrogen  
876 content and leaf anatomy in different plant life forms in New Zealand. *Oecologia* 69:577–  
877 588.
- 878 Korner C, Cochrane PM (1985) Stomatal responses and water relations of *Eucalyptus pauciflora*  
879 in summer along an elevational gradient. *Oecologia* 66:443–455.
- 880 Kostermans A (1980) Clusiaceae (Guttiferae). In: Dassanayake MD, Fosberg FR (eds) A Revised  
881 Handbook to the Flora of Ceylon: Volume I. Amarind, New Delhi, pp 72–110.
- 882 Kouwenberg LLR, Kürschner WM, McElwain JC (2007) Stomatal Frequency Change Over  
883 Altitudinal Gradients: Prospects for Paleoaltimetry. *Rev Mineral Geochem* 66:215–241.
- 884 Lieberman D, Lieberman M, Peralta R, Hartshorn GS (1996) Tropical Forest Structure and  
885 Composition on a Large-Scale Altitudinal Gradient in Costa Rica. *J Ecol* 84:137–152.
- 886 Li C, Zhang X, Liu X, Luukkanen O, Berninger F (2006) Leaf morphological and Pphysiological  
887 responses of *Quercus aquifolioides* along an altitudinal gradient. *Silva Fennica* 40:5–13.
- 888 Lomax BH, Woodward FI, Leitch IJ, Knight CA, Lake JA (2009) Genome size as a predictor of  
889 guard cell length in *Arabidopsis thaliana* is independent of environmental conditions. *New*

- 890           Phytol 181:311–314.
- 891   Luo J, Zang R, Li C (2006) Physiological and morphological variations of *Picea asperata*  
892           populations originating from different altitudes in the mountains of southwestern China. For  
893           Ecol Manage 221:285–290.
- 894   Malhi Y, Aragão LEOC, Galbraith D, Huntingford C, Fisher R, Zelazowski P, Sitch S,  
895           McSweeney C, Meir P (2009) Exploring the likelihood and mechanism of a climate-change-  
896           induced dieback of the Amazon rainforest. Proc Natl Acad Sci USA 106:20610–20615.
- 897   Malhi Y, Gardner TA, Goldsmith GR, Silman MR, Zelazowski P (2014) Tropical Forests in the  
898           Anthropocene. Annual Review of Environment and Resources 39:125–159.
- 899   Malhi Y, Girardin CAJ, Goldsmith GR, Doughty CE, Salinas N, Metcalfe DB, Huaraca Huasco  
900           W, Silva-Espejo JE, Del Aguilla-Pasquell J, Farfán Amézquita F, Aragão LEOC, Guerrieri  
901           R, Ishida FY, Bahar NHA, Farfan-Rios W, Phillips OL, Meir P, Silman M (2017) The  
902           variation of productivity and its allocation along a tropical elevation gradient: a whole carbon  
903           budget perspective. New Phytol 214:1019–1032.
- 904   Malhi Y, Silman M, Salinas N, Bush M, Meir P, Saatchi S (2010) Introduction: Elevation gradients  
905           in the tropics: laboratories for ecosystem ecology and global change research. Glob Chang  
906           Biol 16:3171–3175.
- 907   McElwain JC (2004) Climate-independent paleoaltimetry using stomatal density in fossil leaves  
908           as a proxy for CO<sub>2</sub> partial pressure. Geology 32:1017–1020.
- 909   Meijer W (1983) Anacardiaceae. In: Dassanayake MD, Fosberg FR (eds) A Revised Handbook to

- 910 the Flora of Ceylon: Volume IV. Amarind, New Delhi
- 911 Motsara MR, Roy RN (2008) Guide to Laboratory establishment for plant nutrient analysis. Food  
912 and Agriculture Organization, Rome.
- 913 Niinemets Ü (2001) Global-scale climatic controls of leaf dry mass per area, density, and thickness  
914 in trees and shrubs. *Ecology* 82:453–469.
- 915 Oliveras I, Bentley L, Fyllas NM, Gvozdevaite A, Shenkin AF, Prepah T, Morandi P, Peixoto KS,  
916 Boakye M, Adu-Bredu S, Schwantes Marimon B, Marimon Junior BH, Martin R, Asner G,  
917 Díaz S, Enquist BJ, Malhi Y (2020) The Influence of Taxonomy and Environment on Leaf  
918 Trait Variation Along Tropical Abiotic Gradients. *Frontiers in Forests and Global Change*  
919 3:18.
- 920 Ong CK, Black CR, Saffell RA (1985) Influence of Saturation Deficit on Leaf Production and  
921 Expafision in Stands of Groundnut-{*Arachis hypogaea* L.) Grown Without Irrigation. *Ann*  
922 *Bot* 56:523–536.
- 923 Onoda Y, Wright IJ (2018) The Leaf Economics Spectrum and its Underlying Physiological and  
924 Anatomical Principles. In: Adams WW III, Terashima I (eds) *The Leaf: A Platform for*  
925 *Performing Photosynthesis*. Springer International Publishing, Cham, pp 451–471.
- 926 Osnas JLD, Lichstein JW, Reich PB, Pacala SW (2013) Global leaf trait relationships: mass, area,  
927 and the leaf economics spectrum. *Science* 340:741–744.
- 928 Qiang W-Y, Wang X-L, Chen T, Feng H-Y, An L-Z, He Y-Q, Wang G (2003) Variations of  
929 stomatal density and carbon isotope values of *Picea crassifolia* at different altitudes in the

- 930 Qilian Mountains. *Trees* 17:258–262.
- 931 Reich PB, Oleksyn J (2004) Global patterns of plant leaf N and P in relation to temperature and  
932 latitude. *Proc Natl Acad Sci USA* 101:11001–11006.
- 933 Salah HBH, Tardieu F (1996) Quantitative analysis of the combined effects of temperature,  
934 evaporative demand and light on leaf elongation rate in well-watered field and laboratory-  
935 grown maize plants. *J Exp Bot* 47:1689–1698.
- 936 Sanjeevani HKN, Samarasinghe DP, Jayasinghe HD, Gardiyawasam PH, Wahala WMPSB,  
937 Wijetunga WMGASTB, Ukuwela KDB, Gomes P, De Costa WAJM (2020) Response of tree  
938 community composition, plant diversity and aboveground tree biomass in tropical rainforests  
939 of Sri Lanka to variation in altitude. *Tropical Agricultural Research* 31:87–101.
- 940 Shi Z, Haworth M, Feng Q, Cheng R, Centritto M (2015) Growth habit and leaf economics  
941 determine gas exchange responses to high elevation in an evergreen tree, a deciduous shrub  
942 and a herbaceous annual. *AoB Plants* 7. <http://dx.doi.org/10.1093/aobpla/plv115>
- 943 Squire GR (1990) *The Physiology of Tropical Crop Production*. C.A.B. International, Wallingford.
- 944 Squire GR, Black CR, Ong CK (1983) Response to saturation deficit of leaf extension in a stand  
945 of Pearl Millet (*Pennisetum typhoides* S. & H.)II: II. Dependence on leaf water status and  
946 irradiance. *J Exp Bot* 34:856–865.
- 947 Squire GR, Ong CK (1983) Response to Saturation Deficit of Leaf Extension in a Stand of Pearl  
948 Millet (*Pennisetum typhoides* S. & H.)I: I. Interaction with temperature. *J Exp Bot* 34:846–  
949 855.

- 950 Suhr DD (2005) Principal component analysis vs. exploratory factor analysis (paper 203-30). In:  
951 Proceedings of the thirtieth annual SAS® users group international conference.p 30.
- 952 Tardieu F, Reymond M, Hamard P, Granier C, Muller B (2000) Spatial distributions of expansion  
953 rate, cell division rate and cell size in maize leaves: a synthesis of the effects of soil water  
954 status, evaporative demand and temperature. *J Exp Bot* 51:1505–1514.
- 955 Tardieu F, Reymond M, Muller B, Granier C, Simonneau T, Sadok W, Welcker C (2005) Linking  
956 physiological and genetic analyses of the control of leaf growth under changing  
957 environmental conditions. *Aust J Agric Res* 56:937–946.
- 958 Vazquez G JA, Givnish TJ (1998) Altitudinal gradients in tropical forest composition, structure,  
959 and diversity in the Sierra de Manantlán. *J Ecol* 86:999–1020.
- 960 Wong SC, Cowan IR, Farquhar GD (1979) Stomatal conductance correlates with photosynthetic  
961 capacity. *Nature* 282:424–426.
- 962 Woodward FI (1987) Stomatal numbers are sensitive to increases in CO<sub>2</sub> from pre-industrial  
963 levels. *Nature* 327:617–618.
- 964 Woodward FI, Lake JA, Quick WP (2002) Stomatal development and CO<sub>2</sub>: ecological  
965 consequences. *New Phytol* 153:477–484.
- 966 Wright IJ, Reich PB, Cornelissen JHC, Falster DS, Groom PK, Hikosaka K, Lee W, Lusk CH,  
967 Niinemets Ü, Oleksyn J, Others (2005) Modulation of leaf economic traits and trait  
968 relationships by climate. *Global Ecology Biogeography* 14:411–421.
- 969 Wright IJ, Reich PB, Westoby M (2001) Strategy shifts in leaf physiology, structure and nutrient

970 content between species of high-and low-rainfall and high-and low-nutrient habitats. *Funct*  
971 *Ecol* 15:423–434.

972 Wright IJ, Reich PB, Westoby M, Ackerly DD, Baruch Z, Bongers F, Cavender-Bares J, Chapin  
973 T, Cornelissen JHC, Diemer M, Flexas J, Garnier E, Groom PK, Gulias J, Hikosaka K,  
974 Lamont BB, Lee T, Lee W, Lusk C, Midgley JJ, Navas M-L, Niinemets U, Oleksyn J, Osada  
975 N, Poorter H, Poot P, Prior L, Pyankov VI, Roumet C, Thomas SC, Tjoelker MG, Veneklaas  
976 EJ, Villar R (2004) The worldwide leaf economics spectrum. *Nature* 428:821–827.

977 Zelazowski P, Malhi Y, Huntingford C, Sitch S, Fisher JB (2011) Changes in the potential  
978 distribution of humid tropical forests on a warmer planet. *Philos Trans A Math Phys Eng Sci*  
979 369:137–160.

980 Zhang S-B, Zhou Z-K, Hu H, Xu K, Yan N, Li S-Y (2005) Photosynthetic performances of  
981 *Quercus pannosa* vary with altitude in the Hengduan Mountains, southwest China. *For Ecol*  
982 *Manage* 212:291–301.

983

984 **Figure legends**

985 **Figures in the main text**

986 **Figure 1.** Permanent sampling plots of the present study located at different altitudes in tropical  
987 rainforests of Sri Lanka. Kanneliya Plot 1 (KDN1-117 m asl), Kanneliya Plot 2 (KDN2-174 m  
988 asl), Sinharaja-Enasalwatta Plot 1 (1042 m asl), Sinharaja-Enasalwatta Plot 2 (1065 m asl),  
989 Hakgala Plot (1804 m asl) and Piduruthalagala Plot (2080 m asl).

990 **Figure 2.** Variation of least square (LS) means of stomatal traits of different plant genera with  
991 altitude: (a) Guard cell length; (b) Stomatal density; (c) Epidermal density; (d) Stomatal index; (e)  
992 Potential conductance index. Each data point is the LS mean of different species of each genus at  
993 a given altitude. Error bars indicate standard errors of LS means. Number of data points for each  
994 LS mean varied from 75 to 225.

995 **Figure 3.** Variation of LS means of leaf structural properties of different plant genera with altitude:  
996 (a) Leaf mass per area; (b) Leaf blade area. Number of data points for each LS mean varied from  
997 15 to 45.

998 **Figure 4.** Variation of LS means of leaf nutrients of different plant genera with altitude: (a) Leaf  
999 N; (b) Leaf P; (c) Leaf N:P ratio. Error bars indicate standard errors of LS means. Number of data  
1000 points for each LS mean varied from 3 to 9.

1001 **Figure 5.** Correlation of proxy indices of photosynthetic nitrogen use efficiency ('PNUE') and  
1002 phosphorus use efficiency ('PPUE') to leaf mass per area (LMA) of different plant species (a, b)  
1003 and genera (c, d) in tropical rainforests in Sri Lanka across an altitudinal range from 150 m to 2100  
1004 m above sea level. ● - *Calophyllum*; Δ - *Semecarpus*; □ - *Syzygium*. 'PNUE' and 'PPUE' were  
1005 calculated as the respective ratios of potential conductance index (unitless) and leaf N and P  
1006 concentrations.

1007 **Figure 6.** Variation of potential conductance index (a-c) and leaf mass per area (d-f) of different  
1008 plant species with temperature (a, d), precipitation (b, e) and solar irradiance (c, f) in tropical  
1009 rainforests in Sri Lanka across an altitudinal range from 150 m to 2100 m above sea level. ● -  
1010 *Calophyllum*; Δ - *Semecarpus*; □ - *Syzygium*. Each data point is a species-level mean value.

1011 **Figure 7.** Variation of leaf nitrogen (a - c) and phosphorus (d - f) concentrations of different plant  
1012 species with temperature (a, d), precipitation (b, e) and solar irradiance (c, f) in tropical rainforests  
1013 in Sri Lanka across an altitudinal range from 150 m to 2100 m above sea level. ● - *Calophyllum*;  
1014 Δ - *Semecarpus*; □ - *Syzygium*. Each data point is a species-level mean value.

1015 **Figure 8.** Variation of proxy indices of photosynthetic nitrogen use efficiency ('PNUE') and  
1016 phosphorus use efficiency ('PPUE') of different plant species with temperature (a, d),  
1017 precipitation (b, e) and solar irradiance (c, f) in tropical rainforests in Sri Lanka across an altitudinal  
1018 range from 150 m to 2100 m above sea level. ● - *Calophyllum*; Δ - *Semecarpus*; □ - *Syzygium*.  
1019 Each data point is a species-level mean value.



1020 **Figure 9.** Distribution of plant species in factor space based on factor scores (after rotation) of  
1021 Factors 1 and 2. 1 – 3: Species at 2100 m in Pidurutalagala; 4 – 6: Species at 1800 m in Hakgala;  
1022 7 – 12: Species at 1050 m Sinharaja-Enasalwatte; 13 –20: Species at 150 m in Kanneliya. 1:  
1023 *Calophyllum walkeri*; 2: *Syzygium rotundifolium*; 3: *Syzygium revolutum*; 4: *Syzygium zeylanicum*;  
1024 5: *Syzygium paniculatum*; 6: *Semecarpus obovata*; 7: *Semecarpus gardneri* (At Sin-Enasalwatte);  
1025 8: *Semecarpus parvifolia*; 9: *Syzygium cylindricum*; 10: *Syzygium micranthum*; 11: *Syzygium spp.*;  
1026 12: *Calophyllum acidus*; 13: *Syzygium alubo*; 14: *Syzygium firmum*; 15: *Syzygium neesianum*; 16:  
1027 *Semecarpus gardneri* (At Kanneliya); 17: *Semecarpus subpeltata*; 18: *Semecarpus walkeri*; 19:  
1028 *Calophyllum bracteatum*; 20: *Calophyllum cordato-oblongum*.

1029 **Figure 10.** Dendrogram of cluster analysis based on leaf traits of plant species from three genera  
1030 in permanent sampling plots within tropical rainforests along an altitudinal gradient in Sri Lanka.  
1031 1 – 3: Species at 2100 m asl in Pidurutalagala; 4 – 6: Species at 1800 m in Hakgala; 7 – 12: Species  
1032 at 1050 m in Sinharaja-Enasalwatte; 13 –20: Species at 150 m in Kanneliya. 1: *Calophyllum*  
1033 *walkeri*; 2: *Syzygium rotundifolium*; 3: *Syzygium revolutum*; 4: *Syzygium zeylanicum*; 5: *Syzygium*  
1034 *paniculatum*; 6: *Semecarpus obovata*; 7: *Semecarpus gardneri* (In Sin-Enasalwatte); 8:  
1035 *Semecarpus parvifolia*; 9: *Syzygium cylindricum*; 10: *Syzygium micranthum*; 11: *Syzygium sp.*; 12:  
1036 *Calophyllum acidus*; 13: *Syzygium alubo*; 14: *Syzygium firmum*; 15: *Syzygium neesianum*; 16:  
1037 *Semecarpus gardneri* (In Kanneliya); 17: *Semecarpus subpeltata*; 18: *Semecarpus walkeri*; 19:  
1038 *Calophyllum bracteatum*; 20: *Calophyllum cordato-oblongum*. Six clusters are identified by  
1039 hatched boxes.

1040

#### 1041 **List of supplementary figures**

1042 **Figure S1.** Box plots of distributions of stomatal traits of plant species of tropical rainforests in  
1043 Sri Lanka at different altitudes: (a) guard cell length; (b) stomatal density; (c) epidermal density;  
1044 (d) stomatal index; (e) potential conductance index. Abbreviations for species: Calbrac -  
1045 *Calophyllum bracteatum*; Calcoobl - *Calophyllum cordato-oblongum*; Semgard – *Semecarpus*  
1046 *gardneri* (at 150 and 1050 m); Semsu - *Semecarpus subpeltata*; Semwalk – *Semecarpus walkeri*;  
1047 Syzalu - *Syzygium alubo*; Syzferm - *Syzygium firmum*; Syznees - *Syzygium neesianum*; Calcid -  
1048 *Calophyllum acidus*; Semparv - *Semecarpus parvifolia*; Syzcyl - *Syzygium cylindricum*; Syzmic -  
1049 *Syzygium micranthum*; Syznew - *Syzygium sp.*; Semobo - *Semecarpus obovata*; Syzpan - *Syzygium*  
1050 *paniculatum*; Syzzel - *Syzygium zeylanicum*; Calwalk - *Calophyllum walkeri*; Syzrev - *Syzygium*  
1051 *revolutum*; Syzrot - *Syzygium rotundifolium*.

1052 **Figure S2.** Box plots of distributions of leaf structural traits of plant species of tropical rainforests  
1053 in Sri Lanka at different altitudes: (a) leaf mass per area; (b) leaf blade area. Abbreviations for  
1054 species are as in Fig. S.1.

1055 **Figure S3.** Box plots of distributions of leaf nutrients of plant species of tropical rainforests in Sri  
1056 Lanka at different altitudes: (a) leaf nitrogen; (b) leaf phosphorus; (c) leaf nitrogen:phosphorus  
1057 ratio. Abbreviations for species are as in Fig. S.1.

1058

1059 **Figure S4.** Box plots of distributions of leaf nutrients of plant genera of tropical rainforests in Sri  
1060 Lanka at different altitudes: (a) leaf nitrogen; (b) leaf phosphorus; (c) leaf nitrogen:phosphorus  
1061 ratio.

1062 **Figure S5.** Species-level variation of leaf blade area (LBA) with climatic variables: (a)  
1063 temperature; (b) precipitation; (c) solar irradiance. Regression lines are fitted for *Semecarpus*  
1064 species separately and for *Syzygium* and *Calophyllum* species together. Each data point is a species  
1065 mean.

1066 **Figure S6.** Genus-level variation of leaf blade area (LBA) with climatic variables: (a) temperature;  
1067 (b) precipitation; (c) solar irradiance. Regression lines are fitted for *Semecarpus* separately and  
1068 for *Syzygium* and *Calophyllum* together. Each data point is the mean of different species of a given  
1069 genus.
